# Supplementary material
Source: PubMed Central journal article supplement (PMC3141964)
Supplement: 1109631108_pnas.201109631SI.pdf [file 1109631108_pnas.201109631SI.pdf]

# Supporting Information

Mishra et al. 10.1073/pnas.1109631108

## SI Methods

**Strains and Culture Conditions.** *Candida albicans* strains SC5314, WO1, 1006, and NUM114 were used in this study. Methylated DNA from *C. albicans* was isolated from strain SC5314 grown in Lee's medium at 37 °C containing either low or high nitrogen concentrations favoring yeast or hyphal growth, respectively (1). To study the effect of iron dosage on DNA methylation and transcription, strain SC5314 was grown in a defined medium containing either low (1  $\mu$ M) or high (100  $\mu$ M) ferrous ammonium sulfate. The composition of the iron-defined medium and growth conditions were used as described (2). Phenotypic switching strain WO1 was used to examine the DNA methylation in white and opaque cells using medium and growth conditions as described (3). To examine the effect of loss of methylation, liquid medium was supplemented with 100  $\mu$ M AzaC (Sigma).

**Preparation of a Methyl DNA Binding Column.** A methyl DNA binding column was prepared essentially as described (4) with some modifications. Briefly, the methyl-CpG binding domain (MBD) of the mouse MeCP2 gene was amplified by PCR with primers that contained an NdeI site at the 5' end and a BamHI site at the 3' end of the DNA fragment. PCR conditions and primers were used as described (4) except one primer was modified to introduce an NdeI site (5'-ccgggatccgctccctccaccgtaccgt-3'). The PCR product was digested with BamHI and NdeI restriction enzymes, gel purified, and cloned into the NdeI and BamHI sites of expression vector pET19b (Novagen) to give pET19bhMBD. The recombinant hMBD protein was expressed in *Escherichia coli* strain Rosetta 2 (DE3) pLysS (Novagen) and was concentrated by using a Qiagen Ni-NTA Kit following the manufacturer's protocol (Qiagen). The hMBD protein was coupled to Ni<sup>2+</sup>-NTA agarose beads in a chromatography column (Qiagen). As a control, methylated Sau3AI-digested pBluescript KS(-) vector DNA (Agilent) was prepared in vitro by using CpG methylase (New England Biolabs). Methylated and unmethylated vector DNA fragments were loaded onto the column in buffer B (4) and eluted with a step gradient of 0.1–1 M sodium chloride in buffer B. The eluted DNA fractions were extracted with phenol-chloroform and precipitated with ethanol. Resuspended DNA from each fraction was electrophoresed and transferred to a Zeta-Probe GT nylon membrane (Bio-Rad) by using standard Southern blotting procedure and probed with [ $\alpha$ -<sup>32</sup>P]dCTP-labeled methylated and unmethylated vector DNA.

**Identification of the Methylated Fraction of *C. albicans* Genomic DNA.** Sau3AI-digested total genomic DNA from *C. albicans* strain SC5314 was passed through the hMBD column and eluted with a step gradient of 0.1–1 M NaCl in buffer B as described above. Putative methylated DNAs that eluted with high salt ( $\geq$ 0.6 M NaCl) were cloned into BamHI-digested pBluescript and propagated in *E. coli*. Plasmid DNA from each clone was used in slot blot analysis to identify clones enriched by the hMBD column. The blots were probed separately with [ $\alpha$ -<sup>32</sup>P]dCTP-labeled hMBD-fractionated DNA eluted with high salt ( $\geq$ 0.6 M NaCl) and [ $\alpha$ -<sup>32</sup>P]dCTP-labeled total genomic DNA. The probe hybridization intensities of each clone were measured by Alpha Ease imaging software. Enriched DNA clones were sequenced by

using M13 forward and reverse primers at the Iowa State University DNA sequencing facility.

**DNA Extraction and Methylation Assay Using Isoschizomers.** Total DNA was prepared from *C. albicans* by using a DNeasy Kit following the manufacturer's instructions (Qiagen). Methylation-sensitive and -insensitive restriction endonucleases were used to determine the methylation status of *C. albicans* genomic regions. The isoschizomer pairs HpaII/MspI and Sau3AI/DpnII were used. Genomic DNAs (2  $\mu$ g) were separately digested with isoschizomers Sau3AI (blocked by GAT<sup>me</sup>C hemimethylation) and DpnII (cuts GAT<sup>me</sup>C), HpaII (blocked by <sup>me</sup>CCGG and C<sup>me</sup>CCG), and MspI (blocked by <sup>me</sup>CCGG; cuts C<sup>me</sup>CCG) at 37 °C for 3 h, size fractionated by electrophoresis on a 1% agarose gel, and Southern transferred as described above. The blot was hybridized with a [ $\alpha$ -<sup>32</sup>P]dCTP-labeled DNA probe. DNA probes were PCR-amplified from SC5314 genomic DNA using primers as described (SI Appendix).

**Bisulfite Modification, PCR, Cloning, and Sequencing.** The methylation status of specific genomic regions was examined by bisulfite DNA sequencing (5). Genomic DNA (200 ng) was sonicated to an average size of 500 bp and then subjected to bisulfite treatment using the EZ DNA Methylation Gold Kit following the supplier's instructions (Zymo Research). Each bisulfite reaction included unique unmethylated pBluescript KS(-) vector DNA to determine the efficiency of bisulfite conversion. Treated DNAs were then used for PCR amplification of different loci using primers (SI Appendix) and amplification conditions as described (6). Primers used in PCR amplification were designed by using Meth-Primer software (7). PCR products were size-fractionated on 1% agarose gels in 1 $\times$  TAE buffer (0.04 M Tris acetate, pH 8.3, 1 mM EDTA), and DNA bands of the expected size were excised from the gel. PCR products were recovered by using the QIAquick gel extraction kit (Qiagen), cloned into vector pCR2.1-TOPO (Invitrogen), and transformed into *E. coli* TOP10 competent cells, and individual clones were sequenced in both directions with M13F and M13R primers at the Iowa State DNA Sequencing Facility. Bisulfite-treated control pBluescript KS(-) vector DNA sequencing indicated that bisulfite conversion reactions were efficient and converted all cytosine residues to uracil (SI Appendix). Sequencing data were analyzed by using BioEdit software (8). Logos were prepared by using WebLogo software (<http://weblogo.threeplusone.com/>). DNA sequences were deposited in the GenBank database (accession nos. ET671383–ET671921, HQ690089, HR235325–HR235465, and JJ725187–JJ725299).

**RNA Extraction and Northern Blot Analysis.** Total RNA was extracted from *C. albicans* by using an RNeasy Mini kit following the manufacturer's instructions (Qiagen). RNA (15  $\mu$ g) was first size fractionated by electrophoresis on a 1% agarose gel under denaturing conditions. The RNA samples were then transferred to a Zeta-Probe GT nylon membrane (Bio-Rad) by using standard Northern blotting procedures. The membrane was hybridized with [ $\alpha$ -<sup>32</sup>P]dCTP labeled DNA probes. The probe DNA sequences were generated by PCR amplification and purified with Sephadex G50 columns (Amersham Biosciences).

1. Russell PJ, Welsch JA, Rachlin EM, McCloskey JA (1987) Different levels of DNA methylation in yeast and mycelial forms of *Candida albicans*. *J Bacteriol* 169: 4393–4395.
2. Lan CY, et al. (2004) Regulatory networks affected by iron availability in *Candida albicans*. *Mol Microbiol* 53:1451–1469.

3. Jordan RE, Galgoczy DJ, Johnson AD (2006) Epigenetic properties of white-opaque switching in *Candida albicans* are based on a self-sustaining transcriptional feedback loop. *Proc Natl Acad Sci USA* 103:12807–12812.
4. Cross SH, Charlton JA, Nan X, Bird AP (1994) Purification of CpG islands using a methylated DNA binding column. *Nat Genet* 6:236–244.

5. Clark SJ, Harrison J, Paul CL, Frommer M (1994) High sensitivity mapping of methylated cytosines. *Nucleic Acids Res* 22:2990–2997.  
 6. Baum M, Sanyal K, Mishra PK, Thaler N, Carbon J (2006) Formation of functional centromeric chromatin is specified epigenetically in *Candida albicans*. *Proc Natl Acad Sci USA* 103:14877–14882.

7. Li LC, Dahiya R (2002) MethPrimer: Designing primers for methylation PCRs. *Bioinformatics* 18:1427–1431.  
 8. Hall TA (1999) BioEdit: A user-friendly biological sequence alignment editor and analysis program for Windows 95/98/NT. *Nucleic Acids Symp Series* 41:95–98.

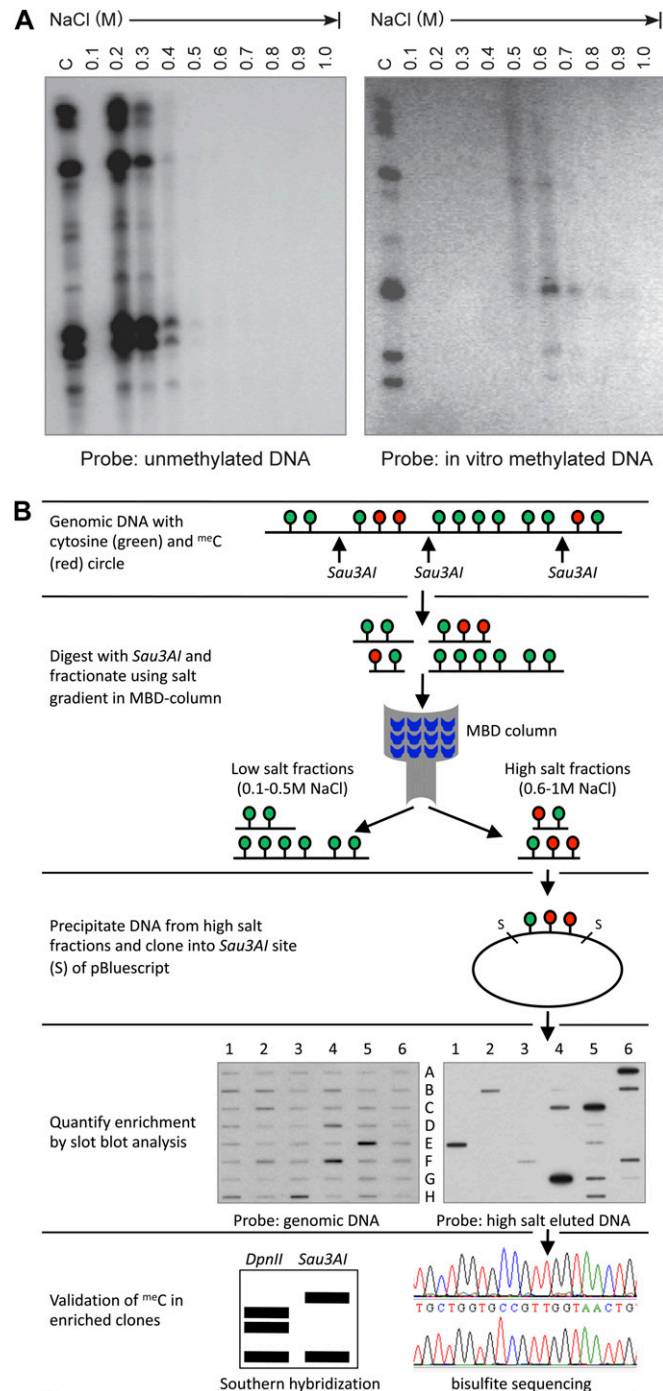

**Fig. S1.** (A) Methylated DNA preferentially binds to an MBD column. *Sau3AI*-digested unique *in vitro* methylated and unique unmethylated DNA fragments derived from pBluescript KS(-) vector DNA were fractionated through the MBD column with a step salt gradient. DNA from each fraction and an unfractionated sample (c) were precipitated, separated on a 1% agarose gel by electrophoresis, and blotted to Zeta-Probe GT nylon membrane. Blots were hybridized with probes made from the unique *in vitro* methylated and unique unmethylated DNA as described above. (B) Identification of enriched, methylated *C. albicans* DNAs. Independently cloned DNAs derived from high salt ( $\geq 0.6$  M) elution fractions of the MBD column were applied to duplicate nylon membranes and were hybridized with <sup>32</sup>P-labeled probes corresponding to unfractionated total genomic DNA or high salt ( $\geq 0.6$  M) eluted DNA. Enrichment is the ratio of high salt eluted DNA to total genomic DNA signals and is normalized to a value of 1 for *CEN1*, an unmethylated region. Clones showing enrichment values twofold higher than *CEN1* were further analyzed.

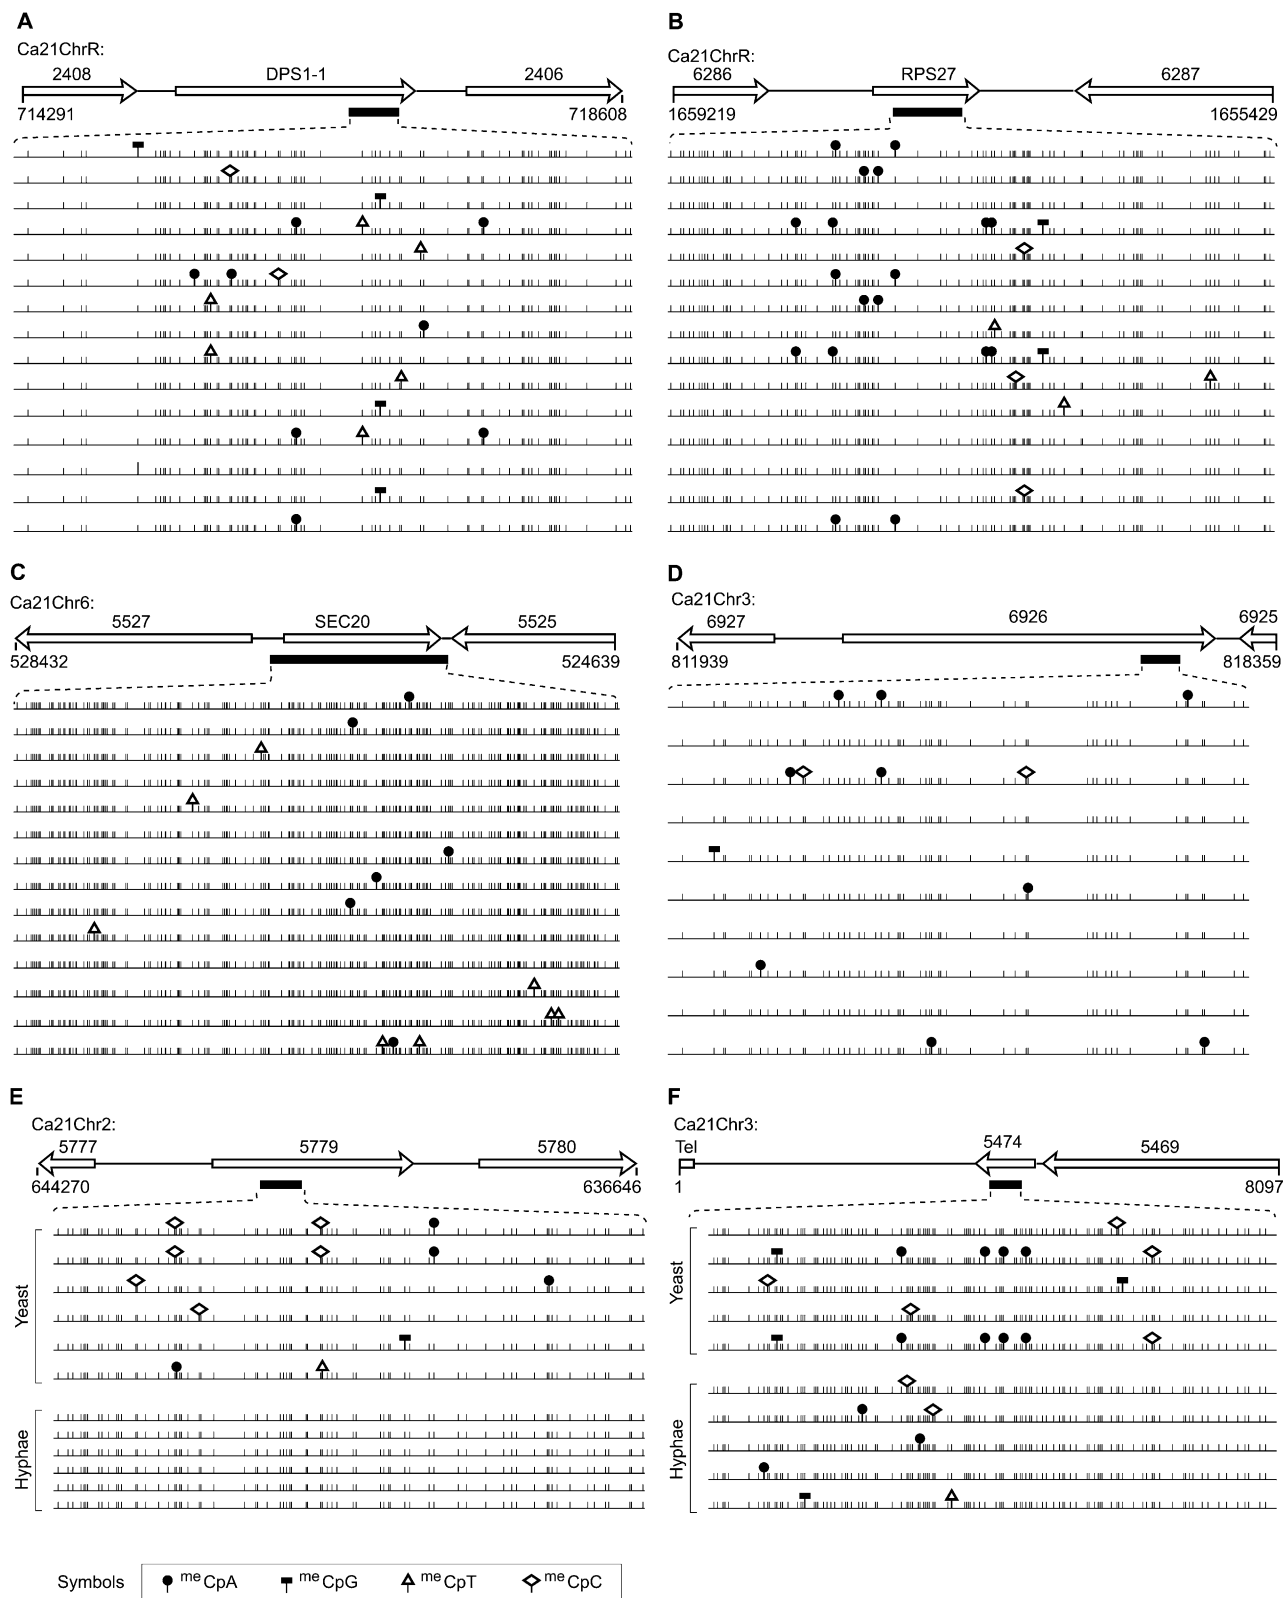

**Fig. S2.** Confirmation of DNA methylation in *C. albicans* genes using bisulfite sequencing. (A–F) Schematics are drawn to scale and are derived from *C. albicans* genome sequence assembly 21 ([www.candidagenome.org](http://www.candidagenome.org)). Bisulfite-converted genomic DNA corresponding to the MBD-affinity enriched DNA fragment, depicted as a filled black bar below the indicated gene, was analyzed by DNA sequencing. Sequences from independent clones were aligned in a lollipop diagram. Cytosine, vertical lines; <sup>me</sup>CpN, symbols as indicated.











## Other Supporting Information Files

[SI Appendix \(PDF\)](#)

[Dataset S1 \(XLS\)](#)
