# Supplementary material
Source: PubMed Central journal article supplement (PMC3141964)
Supplement: 1109631108_sapp.pdf [file 1109631108_sapp.pdf]

# SI Appendix (Mishra et al.)

**Table S1.**

**Distribution of <sup>me</sup>C in protein coding genes of *C. albicans*. Genomic DNA from strain SC5314 (yeast form) was subjected to bisulfite treatment followed by cloning and sequencing (BS-C). <sup>me</sup>C residues (asterisk); transcription start site (TSS); and stop codon (STOP) are marked.**

**(A) Orf19.5749**

|         |                                                                                           |     |     |     |     |     |     |
|---------|-------------------------------------------------------------------------------------------|-----|-----|-----|-----|-----|-----|
|         | 10                                                                                        | 20  | 30  | 40  | 50  | 60  | 70  |
| GENOMIC | ..... ..... ..... ..... ..... ..... ..... ..... ..... ..... ..... ..... ..... ..... ..... |     |     |     |     |     |     |
| BS-C1   | CAAATTAATTGATCAATTGTACTTCATTTTAAATAACTCAAATTGAAGGCTTTCAAATTCGAAATAGA                      |     |     |     |     |     |     |
| BS-C2   | TAAATTAATTGATTAATTGTATTTTATTTTAAATAATATTTAAATTGAAGGTTTTTATATTTTGAAATAGA                   |     |     |     |     |     |     |
| BS-C3   | TAAATTAATTGATTAATTGTATTTTATTTTAAATAATATTTAAATTGAAGGTTTTTATATTTTGAAATAGA                   |     |     |     |     |     |     |
| BS-C4   | TAAATTAATTGATTAATTGTATTTTATTTTAAATAATATTTAAATTGAAGGTTTTTATATTTTGAAATAGA                   |     |     |     |     |     |     |
| BS-C5   | TAAATTAATTGATTAATTGTATTTTATTTTAAATAATATTTAAATTGAAGGTTTTTATATTTTGAAATAGA                   |     |     |     |     |     |     |
|         | 80                                                                                        | 90  | 100 | 110 | 120 | 130 | 140 |
| GENOMIC | ..... ..... ..... ..... ..... ..... TSS ..... ..... ..... ..... ..... ..... ..... .....   |     |     |     |     |     |     |
| BS-C1   | ACATTATTTGAAGAAGAAAAATTACTCATTATGTCTCGACAACCCTCAAACCTCCAACGTATTATGGG                      |     |     |     |     |     |     |
| BS-C2   | ATATTAATTGAAGAAGAAAAATTATTTATTATGTTTTTGATAATTATTTAAATTTTAATTGATTATGGG                     |     |     |     |     |     |     |
| BS-C3   | ATATTAATTGAAGAAGAAAAATTATTTATTATGTTTTTGATAATTATTTAAATTTTAATTGATTATGGG                     |     |     |     |     |     |     |
| BS-C4   | ATATTAATTGAAGAAGAAAAATTATTTATTATGTTTTTGATAATTATTTAAATTTTAATTGATTATGGG                     |     |     |     |     |     |     |
| BS-C5   | ATATTAATTGAAGAAGAAAAATTATTTATTATGTTTTTGATAATTATTTAAATTTTAATTGATTATGGG                     |     |     |     |     |     |     |
|         | 150                                                                                       | 160 | 170 | 180 | 190 | 200 | 210 |
| GENOMIC | ..... ..... ..... ..... ..... ..... ..... ..... ..... ..... *..... ..... ..... .....      |     |     |     |     |     |     |
| BS-C1   | CTCAACGTTTCATCTGAAGATGACGCTGCCAAAAATATCATTATTTAACCATTCAAATATCTGATCCAAT                    |     |     |     |     |     |     |
| BS-C2   | TTTAATGTTTATTTGAAGATGATGTTGTTAAAAATATTATTTATTTAATTATTTAAATATTTGATTTAAT                    |     |     |     |     |     |     |
| BS-C3   | TTTAATGTTTATTTGAAGATGATGTTGTTAAAAATATTATTTATTTAATCATTAAATATTTGATTTAAT                     |     |     |     |     |     |     |
| BS-C4   | TTTAATGTTTATTTGAAGATGATGTTGTTAAAAATATTATTTATTTAATTATTTAAATATTTGATTTAAT                    |     |     |     |     |     |     |
| BS-C5   | TTTAATGTTTATTTGAAGATGATGTTGTTAAAAATATTATTTATTTAATTATTTAAATATTTGATTTAAT                    |     |     |     |     |     |     |
|         | 220                                                                                       | 230 | 240 | 250 | 260 | 270 | 280 |
| GENOMIC | ..... ..... ..... ..... ..... ..... ..... ..... ..... ..... ..... ..... ..... .....       |     |     |     |     |     |     |
| BS-C1   | TGATTTAAAAATAGATTTAAAAAGTGATCATTAAATTATTGATTCATAATCTAATGATTCAGTTTATTCA                    |     |     |     |     |     |     |
| BS-C2   | TGATTTAAAAATAGATTTAAAAAGTGATTTATTTAATTATTGATTTTAAATTTAATGATTTAGTTTATTTA                   |     |     |     |     |     |     |
| BS-C3   | TGATTTAAAAATAGATTTAAAAAGTGATTTATTTAATTATTGATTTTAAATTTAATGATTTAGTTTATTTA                   |     |     |     |     |     |     |
| BS-C4   | TGATTTAAAAATAGATTTAAAAAGTGATTTATTTAATTATTGATTTTAAATTTAATGATTTAGTTTATTTA                   |     |     |     |     |     |     |
| BS-C5   | TGATTTAAAAATAGATTTAAAAAGTGATTTATTTAATTATTGATTTTAAATTTAATGATTTAGTTTATTTA                   |     |     |     |     |     |     |
|         | 290                                                                                       | 300 | 310 | 320 | 330 | 340 | 350 |
| GENOMIC | *..... ..... ..... *..... ..... ..... ..... ..... ..... ..... ..... ..... .....           |     |     |     |     |     |     |
| BS-C1   | TCAATTGATTATCATTTCAAATTTGATTTTTTTCAAAGAAATAGATCCTGATCAATCAAAAATTAATACTG                   |     |     |     |     |     |     |
| BS-C2   | TTAATTGATTATTTATATAAATTGATTTTTTTTAAAGAAATAGATTTTGATTAATTAATAATTAATATTG                    |     |     |     |     |     |     |
| BS-C3   | TTAATTGATTATTTATATAAATTGATTTTTTTTAAAGAAATAGATTTTGATTAATTAATAATTAATATTG                    |     |     |     |     |     |     |
| BS-C4   | TTAATTGATTATTTATATAAATTGATTTTTTTTAAAGAAATAGATTTTGATTAATTAATAATTAATATTG                    |     |     |     |     |     |     |
| BS-C5   | TCAATTGATTATTTATATAAATTGATTTTTTTTAAAGAAATAGATTTTGATTAATTAATAATTAATATTG                    |     |     |     |     |     |     |
|         | 360                                                                                       | 370 | 380 | 390 | 400 | 410 | 420 |
| GENOMIC | ..... ..... ..... ..... ..... ..... *..... ..... ..... ..... ..... ..... .....            |     |     |     |     |     |     |
| BS-C1   | AAAATGGTTCACATATTTTTTATGATTTCTTCGTAAAAAAGATCAACAAGAAGAATATTGGCCACGTTTAAC                  |     |     |     |     |     |     |
| BS-C2   | AAAATGGTTTATATATTTTTTATGATTTTTCTGTAAAAAAGATTAATAAGAAGAATATTGGTTATGTTTAAT                  |     |     |     |     |     |     |
| BS-C3   | AAAATGGTTTATATATTTTTTATGATTTTTCTGTAAAAAAGATTAATAAGAAGAATATTGGTTATGTTTAAT                  |     |     |     |     |     |     |
| BS-C4   | AAAATGGTTTATATATTTTTTATGATTTTTCTGTAAAAAAGATTAATAAGAAGAATATTGGTTATGTTTAAT                  |     |     |     |     |     |     |
| BS-C5   | AAAATGGTTTATATATTTTTTATGATTTTTCTGTAAAAAAGATTAATAAGAAGAATATTGGTTATGTTTAAT                  |     |     |     |     |     |     |

```

          430      440      450      460      470      480      490
GENOMIC  ....|....|....|....|....|....|....|....|....|....|....|....|....|
BS-C1    TAAAGAAAAATTGAAATATCATTATATTTAAAAC TGATTTTGATAAATGGGTGGATGAGGATGAACAAGAT
BS-C2    TAAAGAAAAATTGAAATATTTATTATATTTAAAATTGATTTTGATAAATGGGTGGATGAAGATGAATAAGAT
BS-C3    TAAAGAAAAATTGAAATATTTATTATATTTAAAATTGATTTTGATAAATGGGTGGATGAAGATGAATAAGAT
BS-C4    TAAAGAAAAATTGAAATATTTATTATATTTAAAATTGATTTTGATAAATGGGTGGATGAAGATGAATAAGAT
BS-C5    TAAAGAAAAATTGAAATATTTATTATATTTAAAATTGATTTTGATAAATGGGTGGATGAAGATGAATAAGAT

          500      510      520      530      540      550      560
GENOMIC  ....|....|....|....|....|....|....|....|....|....|....|....|....|
BS-C1    GAAGTTAAAGATGATCCAAATGATTTTGGTGGACCTGGTGGACCTGGTGGAGCTATGGATTTCTCACAAA
BS-C2    GAAGTTAAAGATGATTTAAATGATTTTGGTGGATTTGGTGGATTTGGTGGAGTTATGGATTTTTTATAAA
BS-C3    GAAGTTAAAGATGATTTAAATGATTTTGGTGGATTTGGTGGATTTGGTGGAGTTATGGATTTTTTATAAA
BS-C4    GAAGTTAAAGATGATTTAAATGATTTTGGTGGATTTGGTGGATTTGGTGGAGTTATGGATTTTTTATAAA
BS-C5    GAAGTTAAAGATGATTTAAATGATTTTGGTGGATTTGGTGGATTTGGTGGAGTTATGGATTTTTTATAAA

          570      580      590      600      610      620      630
GENOMIC  ....|....|....|....|....|....|....|....|....|....|....|....|....|
BS-C1    TGTGAGCGGCATGGGCGGTTTAGGTGGCACTGGTGGAAAGTGGCGGTCTGGTGGCGTGCATCTTAGTGC
BS-C2    TGTGAGTGGTATGGGTGGTTTAGGTGGTGTGGTGGAAAGTGGTGGTTTTGGTGGTGTGATTTTAGTGT
BS-C3    TGTGAGTGGTATGGGTGGTTTAGGTGGTGTGGTGGAAAGTGGTGGTTTTGGTGGTGTGATTTTAGTGT
BS-C4    TGTGAGTGGTATGGGTGGTTTAGGTGGTGTGGTGGAAAGTGGTGGTTTTGGTGGTGTGATTTTAGTGT
BS-C5    TGTGAGTGGTATGGGTGGTTTAGGTGGTGTGGTGGAAAGTGGTGGTTTTGGTGGTGTGATTTTAGTGT

          640      650      660      670      680      690      700
GENOMIC  ....|....|....|....|....|....|....|....|....|....|....|....|....|
BS-C1    ATTGGCTTCTCAATTGGGTTAAGCTGGTGGTGCTGGTGGTGCTGCAGGTCTTGATGGTGAAGAAGGCGAA
BS-C2    ATTGGTTTTTTAATTGGGTTAAGTTGGTGGTGTGGTGGTGTGTTGAGGTTTTGATGGTGAAGAAGGTGAA
BS-C3    ATTGGTTTTTTAATTGGGTTAAGTTGGTGGTGTGGTGGTGTGTTGAGGTTTTGATGGTGAAGAAGGTGAA
BS-C4    ATTGGTTTTTTAATTGGGTTAAGTTGGTGGTGTGGTGGTGTGTTGAGGTTTTGATGGTGAAGAAGGTGAA
BS-C5    ATTGGTTTTTTAATTGGGTTAAGTTGGTGGTGTGGTGGTGTGTTGAGGTTTTGATGGTGAAGAAGGTGAA

          710      720      730      740      750      760 ---| 770
GENOMIC  ....|....|....|....|....|....|....|....|....|....|....|....|...STOP...|
BS-C1    GAAGGCGATGAAGAAGCTAAAAAAGCGCAAGAAGAATCAAAATGCCACTGCTACTGAAAAAGAATAATCTC
BS-C2    GAAGGTGATGAAGAAGTTAAAAAAGTGAAGAAGAATTAATGTTATTGTTATTGAAAAAGAATAATTTT
BS-C3    GAAGGTGATGAAGAAGTTAAAAAAGTGAAGAAGAATTAATGTTATTGTTATTGAAAAAGAATAATTTT
BS-C4    GAAGGTGATGAAGAAGTTAAAAAAGTGAAGAAGAATTAATGTTATTGTTATTGAAAAAGAATAATTTT
BS-C5    GAAGGTGATGAAGAAGTTAAAAAAGTGAAGAAGAATTAATGTTATTGTTATTGAAAAAGAATAATTTT

          780      790      800      810      820      830      840
GENOMIC  ....|....|....|....|....|....|....|....|....|....|....|....|....|
BS-C1    AAATAACAAAGTAATACAAAAAAAACCAAAATTATACAGTTGAATAGTCTATTTTATTAGTCAATTTCAA
BS-C2    AAATAATAAAGTAATATAAAAAAAAATAAAATTATATAGTTGAATAGTTTATTTTATTAGTTATTTTAAA
BS-C3    AAATAATAAAGTAATATAAAAAAAAATAAAATTATATAGTTGAATAGTTTATTTTATTAGTTATTTTAAA
BS-C4    AAATAATAAAGTAATATAAAAAAAAATAAAATTATATAGTTGAATAGTTTATTTTATTAGTTATTTTAAA
BS-C5    AAATAATAAAGTAATATAAAAAAAAATAAAATTATATAGTTGAATAGTTTATTTTATTAGTTATTTTAAA

          850      860
GENOMIC  ....|....|....|....|....|.
BS-C1    CCATTTAATAAATATTACTCGTAACG
BS-C2    TTATTTAATAAATATTATTTGTAATG
BS-C3    TTATTTAATAAATATTATTTGTAATG
BS-C4    TTATTTAATAAATATTATTTGTAATG
BS-C5    TTATTTAATAAATATTATTTGTAATG

```

(B) Orf19.2593

```

      10      20      30      40      50      60      70
GENOMIC  ....|....|....|....|....|....|....|....|....|....|....|....|....|
BS-C1    ACAAAGCTACAACAAAACAAAAATTTAGACAATAATGATCACAGAGCCTAGATAGTTGGTTCTGATTTAAA
BS-C2    ATAAAGTTATAATAAATAAAAAATTTAGATAATAATGATTATAGAGTTTAGATAGTTGGTTTTGATTTAAA
BS-C3    ATAAAGTTATAATAAATAAAAAATTTAGATAATAATGATTATAGAGTTTAGATAGTTGGTTTTGATTTAAA
BS-C4    ATAAAGTTATAATAAATAAAAAATTTAGATAATAATGATTATAGAGTTTAGATAGTTGGTTTTGATTTAAA
BS-C5    ATAAAGTTATAATAAATAAAAAATTTAGATAATAATGATTATAGAGTTTAGATAGTTGGTTTTGATTTAAA
      80      90     100|---  110     120     130     140
GENOMIC  ....|....|....|....|....|....|STOP|....|....|....|....|....|....|
BS-C1    ATATATTAATATTATTATTCACGGAGTCTACCTACTTAGTGAAACTTTCCATTGGTTTCAAACCCCATTTTC
BS-C2    ATATATTAATATTATTATTATGGAGTTTATTTATTTAGTGAAATTTTTTTATTGGTTTTAAATTTTATTTT
BS-C3    ATATATTAATATTATTATTATGGAGTTTATTTATTTAGTGAAATTTTTTTATTGGTTTTAAATTTTATTTT
BS-C4    ATATATTAATATTATTATTATGGAGTTTATTTATTTAGTGAAATTTTTTTATTGGTTTTAAATTTTATTTT
BS-C5    ATATATTAATATTATTATTATGGAGTTTATTTATTTAGTGAAATTTTTTTATTGGTTTTAAATTTTATTTT
      150     160     170     180     190     200     210
GENOMIC  ....|....|....|....|....|....|....|....|....|....|....|....|....|
BS-C1    TTCAACATGGCGATATCTTCATCCCAACCATTACACATTGTAGTCAACATTCTCTTACCGGTGAAAAATAG
BS-C2    TTTAATATGGTGATATTTTTATTTTAATTATTATATATTGTAGTTAATATTTTTTTATTGGTGAAAAATAG
BS-C3    TTTAATATGGTGATATTTTTATTTTAATTATTATATATTGTAGTTAATATTTTTTTATTGGTGAAAAATAG
BS-C4    TTTAATATGGTGATATTTTTATTTTAATTATTATATATTGTAGTTAATATTTTTTTATTGGTGAAAAATAG
BS-C5    TTTAATATGGTGATATTTTTATTTTAATTATTATATATTGTAGTTAATATTTTTTTATTGGTGAAAAATAG
      220     230     240     250     260     270     280
GENOMIC  ....|....|....|....|....|....|....|....|....|....|....|....|....|
BS-C1    CATTGACCCCACTCATGAAACACAAGAACTGCTCGTGTTCCTTCATGGTGTATCGACCGGCCGGCCAATCT
BS-C2    TATTGATTTTTATTTATGAAATATAAGAATTGTTTGTGTTTTTTTATGGTGTATTGATTGGTGGTTAATTT
BS-C3    TATTGATTTTTATTTATGAAATATAAGAATTGTTTGTGTTTTTTTATGGTGTATTGATTGGTGGTTAATTT
BS-C4    TATTGATTTTTATTTATGAAATATAAGAATTGTTTGTGTTTTTTTATGGTGTATTGATTGGTGGTTAATTT
BS-C5    TATTGATTTTTATTTATGAAATATAAGAATTGTTTGTGTTTTTTTATGGTGTATTGATTGGTGGTTAATTT
      290     300     310     320     330     340     350
GENOMIC  ....|....|....|....|....|....|....|....|....|....|....|....|....|
BS-C1    AATGATGGATTTCAGGCATAATCAATCTAGCAGTAGCAATAGTTCTCAAAAATAGCATCAAATTTCCAATTGT
BS-C2    AATGATGGATTTAGGTATAAATTAATTTAGTAGTAGTAATAGTTTTTAAAAATAGTATTAATTTTAATTGT
BS-C3    AATGATGGATTTAGGTATAAATTAATTTAGTAGTAGTAATAGTTTTTAAAAATAGTATTAATTTTAATTGT
BS-C4    AATGATGGATTTAGGTATAAATTAATTTAGTAGTAGTAATAGTTTTTAAAAATAGTATTAATTTTAATTGT
BS-C5    AATGATGGATTTAGGTATAAATTAATTTAGTAGTAGTAATAGTTTTTAAAAATAGTATTAATTTTAATTGT
      360     370     380     390     400     410     420
GENOMIC  ....|....|....|....|....|....|....|....|....|....|....|....|....|
BS-C1    CTTTCCTTTGGTGCATTTTTCAACACTTCAACAATTGGAGTACCCCTGGATTGGAACATAATCTGTTGATTG
BS-C2    TTTTTTTTTGGTGTATTTTTTAATATTTTAATAATTGGAGTATTTTGGATTGGAATTAATTTGTTGATTG
BS-C3    TTTTTTTTTGGTGTATTTTTTAATATTTTAATAATTGGAGTATTTTGGATTGGAATTAATTTGTTGATTG
BS-C4    TTTTTTTTTGGTGTATTTTTTAATATTTTAATAATTGGAGTATTTTGGATTGGAATTAATTTGTTGATTG
BS-C5    TTTTTTTTTGGTGTATTTTTTAATATTTTAATAATTGGAGTATTTTGGATTGGAATTAATTTGTTGATTG
      430     440     450     460     470     480     490
GENOMIC  ....|....|....|....|....|....|....|....|....|....|....|....|....|
BS-C1    GCAATGATTTCTGGGTGCGGACTCATGTTGGACAAAGTGTACAAAAACGAAACATGATCTTGTCGGTTTTTC
BS-C2    GTAATGATTTTTGGGTGTTGGATTTATGTTGGATAAAGTGTATAAAAAATGAAATATGATTTTTGTGTGGTTTT
BS-C3    GTAATGATTTTTGGGTGTTGGATTTATGTTGGATAAAGTGTATAAAAAATGAAATATGATTTTTGTGTGGTTTT
BS-C4    GTAATGATTTTTGGGTGTTGGATTTATGTTGGATAAAGTGTATAAAAAATGAAATATGATTTTTGTGTGGTTTT
BS-C5    GTAATGATTTTTGGGTGTTGGATTTATGTTGGATAAAGTGTATAAAAAATGAAATATGATTTTTGTGTGGTTTT
```

```

          500      510      520      530      540      550      560
GENOMIC  ....|....|....|....|....|....|....|*....|....|....|....|
BS-C1    TCCCAATCCGAGAATACCACCGGTACAAGCTTTGATACCAGCTTTTTGGACGTTTTTAATGGTTTCTAAT
BS-C2    TTTTAATTTGAGAATATTATTGGTATAAAGTTTTGATATTAATTTTTGGATGTTTTAATGGTTTTAAT
BS-C3    TTTTAATTTGAGAATATTATTGGTATAAAGTTTTGATATTAATTTTTGGACGTTTTTAATGGTTTTAAT
BS-C4    TTTTAATTTGAGAATATTATTGGTATAAAGTTTTGATATTAATTTTTGGATGTTTTAATGGTTTTAAT
BS-C5    TTTTAATTTGAGAATATTATTGGTATAAAGTTTTGATATTAATTTTTGGACGTTTTTAATGGTTTTAAT

          570      580      590      600      610      620      630
GENOMIC  ....|....|....|*....|....|....|....|....|....|....|....|....|
BS-C1    CTTTCGTCTGATGTACGGGTGGTGACGACGTTTGGATAATGTTCTCTTGAAGTGTCAATGTTGTGGTTGT
BS-C2    TTTTTGTTGATGTATGGGTGGTGATGATGTTTGGATAATGTTTTTTTGAAGTGTTAATGTTGTGGTTGT
BS-C3    TTTTTGTTGATGTACGGGTGGTGATGATGTTTGGATAATGTTTTTTTGAAGTGTTAATGTTGTGGTTGT
BS-C4    TTTTTGTTGATGTATGGGTGGTGATGATGTTTGGATAATGTTTTTTTGAAGTGTTAATGTTGTGGTTGT
BS-C5    TTTTTGTTGATGTATGGGTGGTGATGATGTTTGGATAATGTTTTTTTGAAGTGTTAATGTTGTGGTTGT

          640      650      660      670      680      690      700
GENOMIC  ....|....|*....|....|....|....|*....|....|....|....|....|....|....|
BS-C1    AGGCAGTCAAACCATCTGTTTTAAAATTTTCAAGCTGCTTTTCGTTGATCATCCCGAGAGTAAACCAAGT
BS-C2    AGGTAGTTAAATTAATTTTGTTTTAAAATTTTAGTTTGTTTTTTGTGATTATTTTGAAGTAATATAAGT
BS-C3    AGGTAGTTAAATTAATTTTGTTTTAAAATTTTAGTTTGTTTTTTGTGATTATTTTGAAGTAATATAAGT
BS-C4    AGGTAGTTAAATCATTTTGTTTTAAAATTTTCAAGTTTGTTTTTTGTGATTATTTTGAAGTAATATAAGT
BS-C5    AGGTAGTTAAATTAATTTTGTTTTAAAATTTTAGTTTGTTTTTTGTGATTATTTTGAAGTAATATAAGT

          710      720      730      740      750      760      770
GENOMIC  ....|....|....|....|....|....|....|....|....|....|....|....|....|
BS-C1    TTCCAACCTCAACTCGTCGTTGATTTGTTTAAACAACTTTACTGATTTTGTCTAAGGCAGACTTTCTTCCT
BS-C2    TTTTAATTTTAATTTGTTGTTGATTTGTTTAAATAATTTTATTGATTTTGTTAAGGTAGATTTTTTTTTT
BS-C3    TTTTAATTTTAATTTGTTGTTGATTTGTTTAAATAATTTTATTGATTTTGTTAAGGTAGATTTTTTTTTT
BS-C4    TTTTAATTTTAATTTGTTGTTGATTTGTTTAAATAATTTTATTGATTTTGTTAAGGTAGATTTTTTTTTT
BS-C5    TTTTAATTTTAATTTGTTGTTGATTTGTTTAAATAATTTTATTGATTTTGTTAAGGTAGATTTTTTTTTT

          780      790      800      810      820      830      840
GENOMIC  ....|....|....|*....|....|....|....|....|....|*....|*....|*....|....|....|
BS-C1    TGCATATCTCTCCAAGCGGAACCAAGGCAAACCTCTAGTACCACCTCGTCTTTCCGATCTCTAGCAATGT
BS-C2    TGTATATTTTTTAAAGCGGAATTAAGGTAAATTTTAGTATTATTTTGTGTTTTTGCATTTTTAGTAATGT
BS-C3    TGTATATTTTTTAAAGTGAATTAAGGTAAATTTTAGTATTATTTTGTGTTTTTGTATTTTTAGTAATGT
BS-C4    TGTATATTTTTTAAAGTGAATTAAGGTAAATTTTAGTATTATCTTGTGTTTTTGTATTTTTAGTAATGT
BS-C5    TGTATATTTTTTAAAGTGAATTAAGGTAAATTTTAGTATTATTTTGTGTTTTTGTATTTTTAGTAATGT

          850      860      870      880      890      900      910
GENOMIC  .*...|*...|....|....|....|....|....|....|....|*....|*....|*....|....|....|
BS-C1    CCATCACAGCATCCAAGTCGAGTTTTTTCAGCTTGAACCTCCAGTATCATGTTTCGATGATTGAGAACAGTA
BS-C2    TTATTATAGTATTTAAGTTGAGTTTTTTAGTTTGAATTTTAGTATTATGTTTTGATGATTGAGAATAGTA
BS-C3    TTATTATAGTATTTAAGTTAAGTTTTTTAGTTTGAATTTTAGTATTATGTTTTGATGATTGAGAATAGTA
BS-C4    TCATTATAGTATTTAAGTTAAGTTTTTTAGTTTGAATTTTAGTATTATGTTTTGATGATTGAGAATAGTA
BS-C5    TTATTACAGTATTTAAGTTAAGTTTTTTAGTTTGAATTTTAGTATCATGTTTTGATGATTGAGAATAGTA

          920      930      940      950      960      970      980
GENOMIC  ....|....|....|....|....|....|....|....|....|....|....|....|....|....|
BS-C1    AGAACAGTTTTTCGGTACATCCACCTGCTTAATGTTAAACAAGAGTACATAATTGGACTTCAGCAGGTTTT
BS-C2    AGAATAGTTTTTGGTATATTTATTTTGTTTAATGTTAATAAGAGTATATAATTGGATTTTTAGTAGGTTTT
BS-C3    AGAATAGTTTTTGGTATATTTATTTTGTTTAATGTTAATAAGAGTATATAATTGGATTTTTAGTAGGTTTT
BS-C4    AGAATAGTTTTTGGTATATTTATTTTGTTTAATGTTAATAAGAGTATATAATTGGATTTTTAGTAGGTTTT
BS-C5    AGAATAGTTTTTGGTATATTTATTTTGTTTAATGTTAATAAGAGTATATAATTGGATTTTTAGTAGGTTTT

```

```

          990          1000          1010          1020          1030          1040          1050
GENOMIC   ....|....|....|....|....|....|....|....|....|....|....|....|....|....|
BS-C1     TGGTACTCACGATGTTTCAATTGAGCGTTGAAAATCAAATCCATCAATGGAGCATTGTAAATTTTGCTAA
BS-C2     TGGTATTTATGATGTTTTAATTGAGTGTGAAAATTAATTTATTAATGGAGTATTGTAAATTTTGTTAA
BS-C3     TGGTATTTATGATGTTTTAATTGAGTGTGAAAATTAATTTATTAATGGAGTATTGTAAATTTTGTTAA
BS-C4     TGGTATTTATGATGTTTTAATTGAGTGTGAAAATTAATTTATTAATGGAGTATTGTAAATTTTGTTAA
BS-C5     TGGTATTTATGATGTTTTAATTGAGTGTGAAAATTAATTTATTAATGGAGTATTGTAAATTTTGTTAA

          1060          1070          1080          1090          1100          1110          1120
GENOMIC   ....|....|....|....|....|....|....|....|....|....|...*|....|....|
BS-C1     TTTTCATCTTTGGTCCAGTCAGATCTAGGTTTTGAAGATCTGGCTTTGGCCAAAGTATCAGCTGCATTAGA
BS-C2     TTTTATTTTTGGTTTAGTTAGATTTAGGTTTTGAAGATTTGGTTTTGGTTAAAGTATCAGTTGTATTAGA
BS-C3     TTTTATTTTTGGTTTAGTTAGATTTAGGTTTTGAAGATTTGGTTTTGGTTAAAGTATTAGTTGTATTAGA
BS-C4     TTTTATTTTTGGTTTAGTTAGATTTAGGTTTTGAAGATTTGGTTTTGGTTAAAGTATTAGTTGTATTAGA
BS-C5     TTTTATTTTTGGTTTAGTTAGATTTAGGTTTTGAAGATTTGGTTTTGGTTAAAGTATTAGTTTTATTAGA

          1130          1140          1150          1160          1170          1180          1190
GENOMIC   ....|....|....|....|....|....|....|....|....|....|...*|....|....|....|
BS-C1     TACTGTCAATTGGCATTGGCTTGAACCCACTGGCTGTGGATGTAACCTGTGGAGCCAAAAGCTCGTAAAGCT
BS-C2     TATTGTTATTGGTATTGGTTTGAATTTATTGGTTGTGGATGTAACCTGTGGAGTTAAAAGTTTGTAAAGTT
BS-C3     TATTGTTATTGGTATTGGTTTGAATTTATTGGTTGTGGATGTAATTTGTGGAGTTAAAAGTTTGTAAAGTT
BS-C4     TATTGTTATTGGTATTGGTTTGAATTTATTGGTTGTGGATGTAATTTGTGGAGTTAAAAGTTTGTAAAGTT
BS-C5     TATTGTTATTGGTATTGGTTTGAATTTATTGGTTGTGGATGTAATTTGTGGAGTTAAAAGTTTGTAAAGTT

          1200          1210          1220<--          1230          1240          1250          1260
GENOMIC   ....|....|....|....|....|....|...TSS...|....|....|....|....|....|....|
BS-C1     TTGGCGTTCATGGAGAAAAATCTTTTAAACAGACATTGTATAAACGTTGAAGATTTAAAGAAAAAAAAAAACA
BS-C2     TTGGTGTTTATGGAGAAAAATTTTTTAATAGATATTGTATAAATGTTGAAGATTTAAAGAAAAAAAAAAATA
BS-C3     TTGGTGTTTATGGAGAAAAATTTTTTAATAGATATTGTATAAATGTTGAAGATTTAAAGAAAAAAAAAAATA
BS-C4     TTGGTGTTTATGGAGAAAAATTTTTTAATAGATATTGTATAAATGTTGAAGATTTAAAGAAAAAAAAAAATA
BS-C5     TTGGTGTTTATGGAGAAAAATTTTTTAATAGATATTGTATAAATGTTGAAGATTTAAAGAAAAAAAAAAATA

          1270          1280          1290          1300          1310          1320
GENOMIC   ....|....|....|....|....|....|....|....|....|....|....|....|....|
BS-C1     GAAAGATTACGAATAATTTGTTTTAATTGGTGGGTATGAGGTGTTGCGCAGTCGACTCAACAAT
BS-C2     GAAAGATTATGAATAATTTGTTTTAATTGGTGGGTATGAGGTGTTGTGTAGTTGATTTAATAAT
BS-C3     GAAAGATTATGAATAATTTGTTTTAATTGGTGGGTATGAGGTGTTGTGTAGTTGATTTAATAAT
BS-C4     GAAAGATTATGAATAATTTGTTTTAATTGGTGGGTATGAGGTGTTGTGTAGTTGATTTAATAAT
BS-C5     GAAAGATTATGAATAATTTGTTTTAATTGGTGGGTATGAGGTGTTGTGTAGTTGATTTAATAAT

```

## SI Appendix

Table S2.

Treatment of *C. albicans* with 5-azacytidine (AZAC-C) prevents DNA methylation. DNA extracted from yeast form cells of strain SC5314 grown with or without AzaC was subjected to bisulfite treatment prior to cloning and sequencing. <sup>m</sup>C residues were only observed in untreated DNA samples (CONTROL-C) and are denoted with an asterisk. <sup>m</sup>C was not observed in AzaC treated samples. Sequence alignments for two independent presumptive genes are shown.

### (A) Orf19.7270

|            |                                                                                      |     |     |     |     |     |     |
|------------|--------------------------------------------------------------------------------------|-----|-----|-----|-----|-----|-----|
|            | 10                                                                                   | 20  | 30  | 40  | 50  | 60  | 70  |
|            | ..... ..... ..... ..... ..... *..... ..... ..... ..... ..... ..... ..... ..... ..... |     |     |     |     |     |     |
| CONTROL-C1 | GGGTGGTTATTAAATTGTTTGGGGTCGGGGATATGAAGGTGAATTTGTTGAGGGTGTGTTATTTTTGAGTT              |     |     |     |     |     |     |
| CONTROL-C2 | GGGTGGTTATTAAATTGTTTGGGGTTGGGAATATGAAGGTGAATTTGTTGAGGGTGTGTTATTTTTGAGTT              |     |     |     |     |     |     |
| CONTROL-C3 | GGGTGGTTATTAAATTGTTTGGGGTCGGGGATATGAAGGTGAATTTGTTGAGGGTGTGTTATTTTTGAGTT              |     |     |     |     |     |     |
| CONTROL-C4 | GGGTGGTTATTAAATTGTTTGGGGTCGGGGATATGAAGGTGAATTTGTTGAGGGTGTGTTATTTTTGAGTT              |     |     |     |     |     |     |
| CONTROL-C5 | GGGTGGTTATTAAATTGTTTGGGGTTGGGAATATGAAGGTGAATTTGTTGAGGGTGTGTTATTTTTGAGTT              |     |     |     |     |     |     |
| GENOMIC    | GGGTGGTCATCAAACGTGTTTGGGGTCGGGAATATGAAGGTGAACCTCGTTGAGGGTGTGTTATCCTGAGCC             |     |     |     |     |     |     |
| AZAC-C1    | GGGTGGTTATTAAATTGTTTGGGGTTGGGAATATGAAGGTGAATTTGTTGAGGGTGTGTTATTTTTGAGTT              |     |     |     |     |     |     |
| AZAC-C2    | GGGTGGTTATTAAATTGTTTGGGGTTGGGAATATGAAGGTGAATTTGTTGAGGGTGTGTTATTTTTGAGTT              |     |     |     |     |     |     |
| AZAC-C3    | GGGTGGTTATTAAATTGTTTGGGGTTGGGAATATGAAGGTGAATTTGTTGAGGGTGTGTTATTTTTGAGTT              |     |     |     |     |     |     |
| AZAC-C4    | GGGTGGTTATTAAATTGTTTGGGGTTGGGAATATGAAGGTGAATTTGTTGAGGGTGTGTTATTTTTGAGTT              |     |     |     |     |     |     |
| AZAC-C5    | GGGTGGTTATTAAATTGTTTGGGGTTGGGAATATGAAGGTGAATTTGTTGAGGGTGTGTTATTTTTGAGTT              |     |     |     |     |     |     |
|            | 80                                                                                   | 90  | 100 | 110 | 120 | 130 | 140 |
|            | ..... ..... ..... ..... ..... *..... ..... ..... ..... ..... ..... ..... ..... ..... |     |     |     |     |     |     |
| CONTROL-C1 | GTTGTATTGTTGGTTTTGTGGGAGTGCTGTGATTTTATTGTTTAGTGTGGTATATGAGATAGAAGGGGTG               |     |     |     |     |     |     |
| CONTROL-C2 | GTTGTATTGTTGGTTTTGTGGGAGTGTGTTGATTTTATTGTTTAGTGTGGTATATGAGATAGAAGGGGTG               |     |     |     |     |     |     |
| CONTROL-C3 | GTTGTATTGTTGGTTTTGTGGGAGTGCTGTGATTTTATTGTTTAGTGTGGTATATGAGATAGAAGGGGTG               |     |     |     |     |     |     |
| CONTROL-C4 | GTTGTATTGTTGGTTTTGTGGGAGTGTGTTGATTTTATTGTTTAGTGTGGTATATGAGATAGAAGGGGTG               |     |     |     |     |     |     |
| CONTROL-C5 | GTTGTATTGTTGGTTTTGTGGGAGTGTGTTGATTTTATTGTTTAGTGTGGTATATGAGATAGAAGGGGTG               |     |     |     |     |     |     |
| GENOMIC    | GCTGCATTGTCGGTTTTGTGGGAGTGCTGCGATCTCATCGTTTCAGTGTGGTATATGAGATAGAAGGGGTG              |     |     |     |     |     |     |
| AZAC-C1    | GTTGTATTGTTGGTTTTGTGGGAGTGTGTTGATTTTATTGTTTAGTGTGGTATATGAGATAGAAGGGGTG               |     |     |     |     |     |     |
| AZAC-C2    | GTTGTATTGTTGGTTTTGTGGGAGTGTGTTGATTTTATTGTTTAGTGTGGTATATGAGATAGAAGGGGTG               |     |     |     |     |     |     |
| AZAC-C3    | GTTGTATTGTTGGTTTTGTGGGAGTGTGTTGATTTTATTGTTTAGTGTGGTATATGAGATAGAAGGGGTG               |     |     |     |     |     |     |
| AZAC-C4    | GTTGTATTGTTGGTTTTGTGGGAGTGTGTTGATTTTATTGTTTAGTGTGGTATATGAGATAGAAGGGGTG               |     |     |     |     |     |     |
| AZAC-C5    | GTTGTATTGTTGGTTTTGTGGGAGTGTGTTGATTTTATTGTTTAGTGTGGTATATGAGATAGAAGGGGTG               |     |     |     |     |     |     |
|            | 150                                                                                  | 160 | 170 | 180 | 190 | 200 | 210 |
|            | ..... ..... ..... ..... ..... ..... ..... ..... ..... ..... ..... ..... ..... .....  |     |     |     |     |     |     |
| CONTROL-C1 | GTAGTGGTGTATATGTTTAGGGTAGATAAGAAAGTAATATGTTTGAGAGTTGAGAGAGATTTTTAGGGAAA              |     |     |     |     |     |     |
| CONTROL-C2 | GTAGTGGTGTATATGTTTAGGGTAGATAAGAAAGTAATATGTTTGAGAGTTGAGAGAGATTTTTAGGGAAA              |     |     |     |     |     |     |
| CONTROL-C3 | GTAGTGGTGTATATGTTTAGGGTAGATAAGAAAGTAATATGTTTGAGAGTTGAGAGAGATTTTTAGGGAAA              |     |     |     |     |     |     |
| CONTROL-C4 | GTAGTGGTGTATATGTTTAGGGTAGATAAGAAAGTAATATGTTTGAGAGTTGAGAGAGATTTTTAGGGAAA              |     |     |     |     |     |     |
| CONTROL-C5 | GTAGTGGTGTATATGTTTAGGGTAGATAAGAAAGTAATATGTTTGAGAGTTGAGAGAGATTTTTAGGGAAA              |     |     |     |     |     |     |
| GENOMIC    | GTAGTGGTGCACACGTTTCAGGGTAGATAAGAAAGCAATATGTTTGAGAGTTGAGAGAGATCCCAGGGAAA              |     |     |     |     |     |     |
| AZAC-C1    | GTAGTGGTGTATATGTTTAGGGTAGATAAGAAAGTAATATGTTTGAGAGTTGAGAGAGATTTTTAGGGAAA              |     |     |     |     |     |     |
| AZAC-C2    | GTAGTGGTGTATATGTTTAGGGTAGATAAGAAAGTAATATGTTTGAGAGTTGAGAGAGATTTTTAGGGAAA              |     |     |     |     |     |     |
| AZAC-C3    | GTAGTGGTGTATATGTTTAGGGTAGATAAGAAAGTAATATGTTTGAGAGTTGAGAGAGATTTTTAGGGAAA              |     |     |     |     |     |     |
| AZAC-C4    | GTAGTGGTGTATATGTTTAGGGTAGATAAGAAAGTAATATGTTTGAGAGTTGAGAGAGATTTTTAGGGAAA              |     |     |     |     |     |     |
| AZAC-C5    | GTAGTGGTGTATATGTTTAGGGTAGATAAGAAAGTAATATGTTTGAGAGTTGAGAGAGATTTTTAGGGAAA              |     |     |     |     |     |     |

|            |  |                                                                        |     |     |     |     |     |     |  |
|------------|--|------------------------------------------------------------------------|-----|-----|-----|-----|-----|-----|--|
|            |  | 220                                                                    | 230 | 240 | 250 | 260 | 270 | 280 |  |
|            |  | ..... ..... ..... ..... ..... .....* ..... ..... ..... .....           |     |     |     |     |     |     |  |
| CONTROL-C1 |  | TTTGATGTGTTGGGTTTGGTGGTGTAGAGGAGAAGGTCGATTGGTATGAGAATGTTGTTGGGTATGAAGT |     |     |     |     |     |     |  |
| CONTROL-C2 |  | TTTGATGTGTTGGGTTTGGTGGTGTAGAGGAGAAGGTTGATTGGTATGAGAATGTTGTTGGGTATGAAGT |     |     |     |     |     |     |  |
| CONTROL-C3 |  | TTTGATGTGTTGGGTTTGGTGGTGTAGAGGAGAAGGTCGATTGGTATGAGAATGTTGTTGGGTATGAAGT |     |     |     |     |     |     |  |
| CONTROL-C4 |  | TTTGATGTGTTGGGTTTGGTGGTGTAGAGGAGAAGGTCGATTGGTATGAGAATGTTGTTGGGTATGAAGT |     |     |     |     |     |     |  |
| CONTROL-C5 |  | TTTGATGTGTTGGGTTTGGTGGTGTAGAGGAGAAGGTTGATTGGTATGAGAATGTTGTTGGGTATGAAGT |     |     |     |     |     |     |  |
| GENOMIC    |  | TCCGATGTGTTGGGTTTGGTGGTGCAGAGGAGAAGGTCGACTGGTATGAGAATGTTGTTGGGTATGAAGT |     |     |     |     |     |     |  |
| AZAC-C1    |  | TTTGATGTGTTGGGTTTGGTGGTGTAGAGGAGAAGGTTGATTGGTATGAGAATGTTGTTGGGTATGAAGT |     |     |     |     |     |     |  |
| AZAC-C2    |  | TTTGATGTGTTGGGTTTGGTGGTGTAGAGGAGAAGGTTGATTGGTATGAGAATGTTGTTGGGTATGAAGT |     |     |     |     |     |     |  |
| AZAC-C3    |  | TTTGATGTGTTGGGTTTGGTGGTGTAGAGGAGAAGGTTGATTGGTATGAGAATGTTGTTGGGTATGAAGT |     |     |     |     |     |     |  |
| AZAC-C4    |  | TTTGATGTGTTGGGTTTGGTGGTGTAGAGGAGAAGGTTGATTGGTATGAGAATGTTGTTGGGTATGAAGT |     |     |     |     |     |     |  |
| AZAC-C5    |  | TTTGATGTGTTGGGTTTGGTGGTGTAGAGGAGAAGGTTGATTGGTATGAGAATGTTGTTGGGTATGAAGT |     |     |     |     |     |     |  |

|            |  |                            |     |
|------------|--|----------------------------|-----|
|            |  | 290                        | 300 |
|            |  | ..... ..... ..... ..... .. |     |
| CONTROL-C1 |  | AATTTTTGTTAATTTGATGATT     |     |
| CONTROL-C2 |  | AATTTTTGTTAATTTGATGATT     |     |
| CONTROL-C3 |  | AATTTTTGTTAATTTGATGATT     |     |
| CONTROL-C4 |  | AATTTTTGTTAATTTGATGATT     |     |
| CONTROL-C5 |  | AATTTTTGTTAATTTGATGATT     |     |
| GENOMIC    |  | AACCTCTGTCAATCTGATGATC     |     |
| AZAC-C1    |  | AATTTTTGTTAATTTGATGATT     |     |
| AZAC-C2    |  | AATTTTTGTTAATTTGATGATT     |     |
| AZAC-C3    |  | AATTTTTGTTAATTTGATGATT     |     |
| AZAC-C4    |  | AATTTTTGTTAATTTGATGATT     |     |
| AZAC-C5    |  | AATTTTTGTTAATTTGATGATT     |     |

(B) Orf19.5526

|            |  |                                                                               |    |     |     |     |     |     |  |
|------------|--|-------------------------------------------------------------------------------|----|-----|-----|-----|-----|-----|--|
|            |  | 10                                                                            | 20 | 30  | 40  | 50  | 60  | 70  |  |
|            |  | ..... ..... ..... ..... ..... ..... ..... ..... ..... ..... ..... ..... ..... |    |     |     |     |     |     |  |
| CONTROL-C1 |  | ATGTTAATAGTATATTATAAAAAATTAGATAAATTATAATTTTATGATTTTATGATTTGTTTATGTTTTTTGT     |    |     |     |     |     |     |  |
| CONTROL-C2 |  | ATGTTAATAGTATATTATAAAAAATTAGATAAATTATAATTTTATGATTTTATGATTTGTTTATGTTTTTTGT     |    |     |     |     |     |     |  |
| CONTROL-C3 |  | ATGTTAATAGTATATTATAAAAAATTAGATAAATTATAATTTTATGATTTTATGATTTGTTTATGTTTTTTGT     |    |     |     |     |     |     |  |
| CONTROL-C4 |  | ATGTTAATAGTATATTATAAAAAATTAGATAAATTATAATTTTATGATTTTATGATTTGTTTATGTTTTTTGT     |    |     |     |     |     |     |  |
| CONTROL-C5 |  | ATGTTAATAGTATATTATAAAAAATTAGATAAATTATAATTTTATGATTTTATGATTTGTTTATGTTTTTTGT     |    |     |     |     |     |     |  |
| GENOMIC    |  | ATGTC AACAGTATATTATAAAAACTAGATAAATTACAATCCAGATTTACGACTTGTTCCAGCTCTTTGC        |    |     |     |     |     |     |  |
| AZAC-C1    |  | ATGTTAATAGTATATTATAAAAAATTAGATAAATTATAATTTTATGATTTTATGATTTGTTTATGTTTTTTGT     |    |     |     |     |     |     |  |
| AZAC-C2    |  | ATGTTAATAGTATATTATAAAAAATTAGATAAATTATAATTTTATGATTTTATGATTTGTTTATGTTTTTTGT     |    |     |     |     |     |     |  |
| AZAC-C3    |  | ATGTTAATAGTATATTATAAAAAATTAGATAAATTATAATTTTATGATTTTATGATTTGTTTATGTTTTTTGT     |    |     |     |     |     |     |  |
| AZAC-C4    |  | ATGTTAATAGTATATTATAAAAAATTAGATAAATTATAATTTTATGATTTTATGATTTGTTTATGTTTTTTGT     |    |     |     |     |     |     |  |
| AZAC-C5    |  | ATGTTAATAGTATATTATAAAAAATTAGATAAATTATAATTTTATGATTTTATGATTTGTTTATGTTTTTTGT     |    |     |     |     |     |     |  |
|            |  | 80                                                                            | 90 | 100 | 110 | 120 | 130 | 140 |  |
|            |  | ..... ..... ..... ..... ..... ..... ..... ..... ..... .....* ..... .....      |    |     |     |     |     |     |  |
| CONTROL-C1 |  | TTTAATTTATTTGAAGTTGAAGATGAATTTGTTTATAAGGTTAGTTTTGATGATATCGTGTAAAGAAATTGA      |    |     |     |     |     |     |  |
| CONTROL-C2 |  | TTTAATTTATTTGAAATTGAAGATGAATTTGTTTATAAGGTTAGTTTTGATGATATTGTGTAAGAAATTGA       |    |     |     |     |     |     |  |
| CONTROL-C3 |  | TTTAATTTATTTGAAATTGAAGATGAATTTGTTTATAAGGTTAGTTTTGATGATATTGTGTAAGAAATTGA       |    |     |     |     |     |     |  |
| CONTROL-C4 |  | TTTAATTTATTTGAAATTGAAGATGGATTTGTTTATAAGGTTAGTTTTGATGATATTGTGTAAGAAATTGA       |    |     |     |     |     |     |  |
| CONTROL-C5 |  | TTTAATTTATTTGAAGTTGAAGATGAATTTGTTTATAAGGTTAGTTTTGATGATATTGTGTAAGAAATTGA       |    |     |     |     |     |     |  |
| GENOMIC    |  | TTCAATTTATCCGAAGCTGAAGATGAATCTGTCTACAAGGCCAGCTTTGATGACACCGTGCAAGAAATTGA       |    |     |     |     |     |     |  |
| AZAC-C1    |  | TTTAATTTATTTGAAGTTGAAGATGAATTTGTTTATAAGGTTAGTTTTGATGATATTGTGTAAGAAATTGA       |    |     |     |     |     |     |  |
| AZAC-C2    |  | TTTAATTTATTTGAAGTTGAAGATGAATTTGTTTATAAGGTTAGTTTTGATGATATTGTGTAAGAAATTGA       |    |     |     |     |     |     |  |
| AZAC-C3    |  | TTTAATTTATTTGAAGTTGAAGATGAATTTGTTTATAAGGTTAGTTTTGATGATATTGTGTAAGAAATTGA       |    |     |     |     |     |     |  |
| AZAC-C4    |  | TTTAATTTATTTGAAGTTGAAGATGAATTTGTTTATAAGGTTAGTTTTGATGATATTGTGTAAGAAATTGA       |    |     |     |     |     |     |  |
| AZAC-C5    |  | TTTAATTTATTTGAAGTTGAAGATGAATTTGTTTATAAGGTTAGTTTTGATGATATTGTGTAAGAAATTGA       |    |     |     |     |     |     |  |

150 160 170 180 190 200 210  
 .....|.....|.....|.....|.....|.....|.....|.....|.....|.....|.....|.....|.....|.....|.....|.....|  
 CONTROL-C1 TTTGTTATTGATTGTTTTTAAAGATTTTTTTAGATTTTTATGATTTAAAGATAAAATTTAATAAATTTGAT  
 CONTROL-C2 TTTGTTATTGATTGTTTTTAAAGATTTTTTTAGATTTTTATGATTTAAAGATAAAATTTAATAAATTTGAT  
 CONTROL-C3 TTTGTTATTGATTGTTTTTAAAGATTTTTTTAGATTTTTATGATTTAAAGATAAAATTTAATAAATTTGAT  
 CONTROL-C4 TTTGTTATTGATTGTTTTTAAAGATTTTTTTAGATTTTTATGATTTAAAGATAAAATTTAATAAATTTGAT  
 CONTROL-C5 TTTGTTATTGATTGTTTTTAAAGATTTTTTTAGATTTTTATGATTTAAAGATAAAATTTAATAAATTTGAT  
 GENOMIC TCTGTTATTGATTGCTTTCAAAGACCTCCTTAGACTTTTACGACCCAAAAGATAAAATCCAACAAAATTCGAT  
 AZAC-C1 TTTGTTATTGATTGTTTTTAAAGATTTTTTTAGATTTTTATGATTTAAAGATAAAATTTAATAAATTTGAT  
 AZAC-C2 TTTGTTATTGATTGTTTTTAAAGATTTTTTTAGATTTTTATGATTTAAAGATAAAATTTAATAAATTTGAT  
 AZAC-C3 TTTGTTATTGATTGTTTTTAAAGATTTTTTTAGATTTTTATGATTTAAAGATAAAATTTAATAAATTTGAT  
 AZAC-C4 TTTGTTATTGATTGTTTTTAAAGATTTTTTTAGATTTTTATGATTTAAAGATAAAATTTAATAAATTTGAT  
 AZAC-C5 TTTGTTATTGATTGTTTTTAAAGATTTTTTTAGATTTTTATGATTTAAAGATAAAATTTAATAAATTTGAT

220 230 240 250 260 270 280  
 .....|.....|.....|.....|.....|.....|.....|.....|.....|.....|.....|.....|.....|.....|.....|.....|  
 CONTROL-C1 ATATATGAATTGAAATTTTATTTTTTTGAAGTATAAAATTTGTGTGAGTTGTAAGTATTTATTAATGATTAAT  
 CONTROL-C2 ATATATGAATTGAAATTTTATTTTTTTGAAGTATAAAATTTGTGTGAGTTGTAAGTATTTATTAATGATTAAT  
 CONTROL-C3 ATATATGAATTGAAATTTTATTTTTTTGAAGTATAAAATTTGTGTGAGTTGTAAGTATTTATTAATGATTAAT  
 CONTROL-C4 ATATATGAATTGAAATTTTATTTTTTTGAAGTATAAAATTTGTGTGAGTTGTAAGTATTTATTAATGATTAAT  
 CONTROL-C5 ATATATGAATTGAAATTTTATTTTTTTGAAGTATAAAATTTGTGTGAGTTGTAAGTATTTATTAATGATTAAT  
 GENOMIC ACATACGAATTGAAATTTTCATTCCTTTGAAGCACAAAATTCGCTGAGTTGCAAGTATTTATTAATGATCAAC  
 AZAC-C1 ATATATGAATTGAAATTTTATTTTTTTGAAGTATAAAATTTGTGTGAGTTGTAAGTATTTATTAATGATTAAT  
 AZAC-C2 ATATATGAATTGAAATTTTATTTTTTTGAAGTATAAAATTTGTGTGAGTTGTAAGTATTTATTAATGATTAAT  
 AZAC-C3 ATATATGAATTGAAATTTTATTTTTTTGAAGTATAAAATTTGTGTGAGTTGTAAGTATTTATTAATGATTAAT  
 AZAC-C4 ATATATGAATTGAAATTTTATTTTTTTGAAGTATAAAATTTGTGTGAGTTGTAAGTATTTATTAATGATTAAT  
 AZAC-C5 ATATATGAATTGAAATTTTATTTTTTTGAAGTATAAAATTTGTGTGAGTTGTAAGTATTTATTAATGATTAAT

290 300 310 320 330 340 350  
 .....|.....|.....|.....|.....|.....|.....|.....|.....|.....|.....|\*.....|.....|.....|.....|.....|  
 CONTROL-C1 AATAAGATAAGTTGTATGAATATAGGATAAAGTATTTTTATTTATAAGATTTGTTTGTGGATATTATTAA  
 CONTROL-C2 AATAAGATAAGTTGTATGAATATAGGATAAAGTATTTTTATTTATAAGATTTGTTTGTGGATATTATTAA  
 CONTROL-C3 AATAAGATAAGTTGTATGAATATAGGATAAAGTATTTTTATTTATAAGATTTGTTTGTGGATATTATTAA  
 CONTROL-C4 AATAAGATAAGTTGTATGAATATAGGATAAAGTATTTTTATTTATAAGATTTGTTTGTGGATATTATTAA  
 CONTROL-C5 AATAAGATAAGTTGTATGAATATAGGATAAAGTATTTTTATTTATAAGATCTGTTTGTGGATATTATTAA  
 GENOMIC AACCAAGACAAGTTGCATGAATATAGGATAAAGCATTTCCATCTACAAGATCTGCCTGTGGATACCATCAA  
 AZAC-C1 AATAAGATAAGTTGTATGAATATAGGATAAAGTATTTTTATTTATAAGATTTGTTTGTGGATATTATTAA  
 AZAC-C2 AATAAGATAAGTTGTATGAATATAGGATAAAGTATTTTTATTTATAAGATTTGTTTGTGGATATTATTAA  
 AZAC-C3 AATAAGATAAGTTGTATGAATATAGGATAAAGTATTTTTATTTATAAGATTTGTTTGTGGATATTATTAA  
 AZAC-C4 AATAAGATAAGTTGTATGAATATAGGATAAAGTATTTTTATTTATAAGATTTGTTTGTGGATATTATTAA  
 AZAC-C5 AATAAGATAAGTTGTATGAATATAGGATAAAGTATTTTTATTTATAAGATTTGTTTGTGGATATTATTAA

360 370 380 390 400 410 420  
 .....|.....|.....|.....|.....\*|.....|.....|.....|\*.....|.....|\*.....|.....|.....|.....|.....|  
 CONTROL-C1 TAATGAATTTGTTTGTAGATTAATTAATTTGTTGATTGTTTTATTAAGAAGATTAAGAAAAGAAAAGAAAGTG  
 CONTROL-C2 TAATGAATTTGTTTGTAGATTAATTAATTTGTTGATTGTTTTATTAAGAAGATTAAGAAAAGAAAAGAAAGTG  
 CONTROL-C3 TAATGAATTTGTTTGTAGATTAATTAATTTGTTGATTGTTTTATTAAGAAGATTAAGAAAAGAAAAGAAAGTG  
 CONTROL-C4 TAATGAATTTGTTTGTAGATTAATTAATTTGTTGATTGTTTTATTAAGAAGATTAAGAAAAGAAAAGAAAGTG  
 CONTROL-C5 TAATGAATTTGTTTGTAGATTAATCATTGTTGATTGTTTTACTAAGAAGATTAAGAAAAGAAAAGAAAGTG  
 GENOMIC TAACGAATTTGCTCGAGACCAATTAATTTGCTGATCGTTCCACTAAGAAGATTAAGAAAAGAAAAGAAAGCG  
 AZAC-C1 TAATGAATTTGTTTGTAGATTAATTAATTTGTTGATTGTTTTATTAAGAAGATTAAGAAAAGAAAAGAAAGTG  
 AZAC-C2 TAATGAATTTGTTTGTAGATTAATTAATTTGTTGATTGTTTTATTAAGAAGATTAAGAAAAGAAAAGAAAGTG  
 AZAC-C3 TAATGAATTTGTTTGTAGATTAATTAATTTGTTGATTGTTTTATTAAGAAGATTAAGAAAAGAAAAGAAAGTG  
 AZAC-C4 TAATGAATTTGTTTGTAGATTAATTAATTTGTTGATTGTTTTATTAAGAAGATTAAGAAAAGAAAAGAAAGTG  
 AZAC-C5 TAATGAATTTGTTTGTAGATTAATTAATTTGTTGATTGTTTTATTAAGAAGATTAAGAAAAGAAAAGAAAGTG





```

          710          720          730          740          750          760          770
...|. ...|. ...|. ...|. ...|. ...|. ...|. ...|. ...|. ...|. ...|. ...|.
CONTROL-C1 TGGTTTATAGAAGAATTTTAAGGTGATTATTTAAAAATATTTTTGTGGTTTTTTTTTAAGATTTTAAATAT
CONTROL-C2 TGGTTTATAGAAGAATTTTAAGGTGATTATTTAAAAATATTTTTGTGGTTTTTTTTTAAGATTTTAAATAT
CONTROL-C3 TGGTTTATAGAAGAATTTTAAGGTGATTATTTAAAAATATTTTTGTGGTTTTTTTTTAAGATTTTAAATAT
CONTROL-C4 TGGTTTATAGAAGAATTTTAAGGTGATTATTTAAAAATATTTTTGTGGTTTTTTTTTAAGATTTTAAATAT
CONTROL-C5 TGGTTTATAGAAGAATTTTAAGGTGATTATTTAAAAATATTTTTGTGGTTTTTTTTTAAGATTTTAAATAT
GENOMIC    TGGTTTATAGAAGAATTTTAAGGCGACCCTTAAAAATTCTTGTTGGTCCTTTTTCAAGATCTTAAATAT
AZAC-C1    TGGTTTATAGAAGAATTTTAAGGTGATTATTTAAAAATATTTTTGTGGTTTTTTTTTAAGATTTTAAATAT
AZAC-C2    TGGTTTATAGAAGAATTTTAAGGTGATTATTTAAAAATATTTTTGTGGTTTTTTTTTAAGATTTTAAATAT
AZAC-C3    TGGTTTATAGAAGAATTTTAAGGTGATTATTTAAAAATATTTTTGTGGTTTTTTTTTAAGATTTTAAATAT
AZAC-C4    TGGTTTATAGAAGAATTTTAAGGTGATTATTTAAAAATATTTTTGTGGTTTTTTTTTAAGATTTTAAATAT
AZAC-C5    TGGTTTATAGAAGAATTTTAAGGTGATTATTTAAAAATATTTTTGTGGTTTTTTTTTAAGATTTTAAATAT

```

```

          780          790          800          810          820          830          840
...|. ...|. ...|. ...|. ...|. ...|. ...|. ...|. ...|. ...|. ...|. ...|.
CONTROL-C1 TTTTAATTGGTTGTTTGGAGGTGGTAGAAGTAAAGGGTTATTTGTAAGTGATATGATAGTTTTATTTGTG
CONTROL-C2 TTTTAATTGGTTGTTTGGAGGTGGTAGAAGTAAAGGGTTATTTGTAAGTGATATGATAGTTTTATTTGTG
CONTROL-C3 TTTTAATTGGTTGTTTGGAGGTGGTAGAAGTAAAGGGTTATTTGTAAGTGATATGATAGTTTTATTTGTG
CONTROL-C4 TTTTAATTGGTTGTTTGGAGGTGGTAGAAGTAAAGGGTTATTTGTAAGTGATATGATAGTTTTATTTGTG
CONTROL-C5 TTTTAATTGGTTGTTTGGAGGTGGTAGAAGTAAAGGGTTATTTGTAAGTGATATGATAGTTTTATTTGTG
GENOMIC    TTTCAACTGGTTGCTTGGAGGTGGTAGAAGTAAAGGGTTATCTGCAAGTGATATGATAGTTTCATCTGTG
AZAC-C1    TTTTAATTGGTTGTTTGGAGGTGGTAGAAGTAAAGGGTTATTTGTAAGTGATATGATAGTTTTATTTGTG
AZAC-C2    TTTTAATTGGTTGTTTGGAGGTGGTAGAAGTAAAGGGTTATTTGTAAGTGATATGATAGTTTTATTTGTG
AZAC-C3    TTTTAATTGGTTGTTTGGAGGTGGTAGAAGTAAAGGGTTATTTGTAAGTGATATGATAGTTTTATTTGTG
AZAC-C4    TTTTAATTGGTTGTTTGGAGGTGGTAGAAGTAAAGGGTTATTTGTAAGTGATATGATAGTTTTATTTGTG
AZAC-C5    TTTTAATTGGTTGTTTGGAGGTGGTAGAAGTAAAGGGTTATTTGTAAGTGATATGATAGTTTTATTTGTG

```

```

          850          860          870          880          890          900          910
..*|. ...|. ...|. ...|. ...|. ...|. ...|. ...|. ...|. ...|. ...|. ...|.
CONTROL-C1 ATCGTTGTTATTATGGAAATTGTTGATTATGAGGTAATGAAAATATTGTTGGATATTTTGTGATGTTG
CONTROL-C2 ATTGTTGTTATTATGGAAATTGTTGATTATGAGGTAATGAAAATTTTGTGGATATTTTGTGAATGTTG
CONTROL-C3 ATTGTTGTTATTATGGAAATTGTTGATTATGAGGTAATGAAAATATTGTTGGATATTTTGTGATGTTG
CONTROL-C4 ATTGTTGTTATTATGGAAATTGTTGATTATGAGGTAATGAAAATATTGTTGGATATTTTGTGATGTTG
CONTROL-C5 ATTGTTGTTATTATGGAAATTGTTGATTATGAGGTAATGAAAATATTGTTGGATATTTTGTGATGTTG
GENOMIC    ATCGCTGCTACCACGGAAATCGTCGACTATGAGGCAACGAAAACATTGTTGGATACCTTGTGCAACGCTG
AZAC-C1    ATTGTTGTTATTATGGAAATTGTTGATTATGAGGTAATGAAAATATTGTTGGATATTTTGTGATGTTG
AZAC-C2    ATTGTTGTTATTATGGAAATTGTTGATTATGAGGTAATGAAAATATTGTTGGATATTTTGTGATGTTG
AZAC-C3    ATTGTTGTTATTATGGAAATTGTTGATTATGAGGTAATGAAAATATTGTTGGATATTTTGTGATGTTG
AZAC-C4    ATTGTTGTTATTATGGAAATTGTTGATTATGAGGTAATGAAAATATTGTTGGATATTTTGTGATGTTG
AZAC-C5    ATTGTTGTTATTATGGAAATTGTTGATTATGAGGTAATGAAAATATTGTTGGATATTTTGTGATGTTG

```

```

          920          930          940          950          960          970          980
...|. ...|. ...|. ...|. ...|. ...|. ...|. ...|. ...|. ...|. ...|. ...|.
CONTROL-C1 TGGATTTTAAATATAGTGATTGATATATTTGTAATGGTAGTGGAAATTTTTTATGAGATTATTAATGGAATA
CONTROL-C2 TGGATTTTAAATATAGTGATTGATATATTTGTAATGGTAGTGGAAATTTTTTATGATATTAATGGAATA
CONTROL-C3 TGGATTTTAAATATAGTGATTGATATATTTGTAATGGTAGTGGAAATTTTTTATGAGATTATTAATGGAATA
CONTROL-C4 TGGATTTTAAATATAGTGATTGATATATTTGTAATGGTAGTGGAAATTTTTTATGAGATTATTAATGGAATA
CONTROL-C5 TGGATTTTAAATATAGTGATTGATATATTTGTAATGGTAGTGGAAATTTTTTATGAGATTATTAATGGAATA
GENOMIC    TGGACTCTAATACAGCGATTGATACACTTCAATGGTAGTGGAAATCTCTTACGAGATCATCAATGGAACA
AZAC-C1    TGGATTTTAAATATAGTGATTGATATATTTGTAATGGTAGTGGAAATTTTTTATGAGATTATTAATGGAATA
AZAC-C2    TGGATTTTAAATATAGTGATTGATATATTTGTAATGGTAGTGGAAATTTTTTATGAGATTATTAATGGAATA
AZAC-C3    TGGATTTTAAATATAGTGATTGATATATTTGTAATGGTAGTGGAAATTTTTTATGAGATTATTAATGGAATA
AZAC-C4    TGGATTTTAAATATAGTGATTGATATATTTGTAATGGTAGTGGAAATTTTTTATGAGATTATTAATGGAATA
AZAC-C5    TGGATTTTAAATATAGTGATTGATATATTTGTAATGGTAGTGGAAATTTTTTATGAGATTATTAATGGAATA

```

## SI Appendix

**Table S3. Bisulfite sequencing of pBluescript KS(-) vector DNA used to monitor the efficiency of bisulfite conversion. Representative sequences from 10 independent clones are shown.**

|              |                                                                         |                                                               |     |     |     |     |  |
|--------------|-------------------------------------------------------------------------|---------------------------------------------------------------|-----|-----|-----|-----|--|
|              | 10                                                                      | 20                                                            | 30  | 40  | 50  | 60  |  |
| Genomic      | ..... ..... ..... ..... ..... ..... ..... ..... ..... ..... ..... ..... | CAGGAAACAGCTATGACCATGATTACGCCAAGCGCGCAATTAACCCCTCACTAAAGGGAAC |     |     |     |     |  |
| Bisulfite-1  | TAGGAAATAGTTATGATTATGATTATGTTAAGTTTGAAATTAATTTTTATTAAAGGGAAT            |                                                               |     |     |     |     |  |
| Bisulfite-2  | TAGGAAATAGTTATGATTATGATTATGTTAAGTTTGAAATTAATTTTTGTTAAAGGGAAT            |                                                               |     |     |     |     |  |
| Bisulfite-3  | TAGGAAATAGTTATGATTATGATTATGTTAAGTTTGAAATTAATTTTTATTAAAGGGAAT            |                                                               |     |     |     |     |  |
| Bisulfite-4  | TAGGAAATAGTTATGATTATGATTATGTTAAGTTTGAAATTAATTTTTATTAAAGGGAAT            |                                                               |     |     |     |     |  |
| Bisulfite-5  | TAGGAAATAGTTATGATTATGATTATGTTAAGTTTGAAATTAATTTTTATTAAAGGGAAT            |                                                               |     |     |     |     |  |
| Bisulfite-6  | TAGGAAATAGTTATGATTATGATTATGTTAAGTTTGAAATTAATTTTTATTAAAGGGAAT            |                                                               |     |     |     |     |  |
| Bisulfite-7  | TAGGAAATAGTTATGATTATGATTATGTTAAGTTTGAAATTAATTTTTATTAAAGGGAAT            |                                                               |     |     |     |     |  |
| Bisulfite-8  | TAGGAAATAGTTATGATTATGATTATGTTAAGTTTGAAATTAATTTTTATTAAAGGGAAT            |                                                               |     |     |     |     |  |
| Bisulfite-9  | TAGGAAATAGTTATGATTATGATTATGTTAAGTTTGAAATTAATTTTTATTAAAGGGAAT            |                                                               |     |     |     |     |  |
| Bisulfite-10 | TAGGAAATAGTTATGATTATGATTATGTTAAGTTTGAAATTAATTTTTATTAAAGGGAAT            |                                                               |     |     |     |     |  |
|              | 70                                                                      | 80                                                            | 90  | 100 | 110 | 120 |  |
| Genomic      | ..... ..... ..... ..... ..... ..... ..... ..... ..... ..... ..... ..... | AAAAGCTGGGTACCGGGCCCCCCTCGAGGTCGACGGTATCGATAAGCTTGATATCGAAT   |     |     |     |     |  |
| Bisulfite-1  | AAAAGTTGGGTATTGGGTTTTTTTTTTGAGGTTGATGGTATTGATAAGTTTGATATTGAAT           |                                                               |     |     |     |     |  |
| Bisulfite-2  | AAAAGTTGGGTATTGGGTTTTTTTTTTGAGGTTGATGGTATTGATAAGTTTGATATTGAAT           |                                                               |     |     |     |     |  |
| Bisulfite-3  | AAAAGTTGGGTATTGGGTTTTTTTTTTGAGGTTGATGGTATTGATAAGTTTGATATTGAAT           |                                                               |     |     |     |     |  |
| Bisulfite-4  | AAAAGTTGGGTATTGGGTTTTTTTTTTGAGGTTGATGGTATTGATAAGTTTGATATTGAAT           |                                                               |     |     |     |     |  |
| Bisulfite-5  | AAAAGTTGGGTATTGGGTTTTTTTTTTGAGGTTGATGGTATTGATAAGTTTGATATTGAAT           |                                                               |     |     |     |     |  |
| Bisulfite-6  | AAAAGTTGGGTATTGGGTTTTTTTTTTGAGGTTGATGGTATTGATAAGTTTGATATTGAAT           |                                                               |     |     |     |     |  |
| Bisulfite-7  | AAAAGTTGGGTATTGGGTTTTTTTTTTGAGGTTGATGGTATTGATAAGTTTGATATTGAAT           |                                                               |     |     |     |     |  |
| Bisulfite-8  | AAAAGTTGGGTATTGGGTTTTTTTTTTGAGGTTGATGGTATTGATAAGTTTGATATTGAAT           |                                                               |     |     |     |     |  |
| Bisulfite-9  | AAAAGTTGGGTATTGGGTTTTTTTTTTGAGGTTGATGGTATTGATAAGTTTGATATTGAAT           |                                                               |     |     |     |     |  |
| Bisulfite-10 | AAAAGTTGGGTATTGGGTTTTTTTTTTGAGGTTGATGGTATTGATAAGTTTGATATTGAAT           |                                                               |     |     |     |     |  |
|              | 130                                                                     | 140                                                           | 150 | 160 | 170 | 180 |  |
| Genomic      | ..... ..... ..... ..... ..... ..... ..... ..... ..... ..... ..... ..... | TCCTGCAGCCCCGGGGATCCACTAGTTCTAGAGCGGCCCGCCACCGCGGTGGAGCTCCAAT |     |     |     |     |  |
| Bisulfite-1  | TTTTGTAGTTTGGGGGATTTATTAGTTTTAGAGTGGTTGTTATTGTGGTGGAGTTTTAAT            |                                                               |     |     |     |     |  |
| Bisulfite-2  | TTTTGTAGTTTGGGGGATTTATTAGTTTTAGAGTGGTTGTTATTGTGGTGGAGTTTTAAT            |                                                               |     |     |     |     |  |
| Bisulfite-3  | TTTTGTAGTTTGGGGGATTTATTAGTTTTAGAGTGGTTGTTATTGTGGTGGAGTTTTAAT            |                                                               |     |     |     |     |  |
| Bisulfite-4  | TTTTGTAGTTTGGGGGATTTATTAGTTTTAGAGTGGTTGTTATTGTGGTGGAGTTTTAAT            |                                                               |     |     |     |     |  |
| Bisulfite-5  | TTTTGTAGTTTGGGGGATTTATTAGTTTTAGAGTGGTTGTTATTGTGGTGGAGTTTTAAT            |                                                               |     |     |     |     |  |
| Bisulfite-6  | TTTTGTAGTTTGGGGGATTTATTAGTTTTAGAGTGGTTGTTATTGTGGTGGAGTTTTAAT            |                                                               |     |     |     |     |  |
| Bisulfite-7  | TTTTGTAGTTTGGGGGATTTATTAGTTTTAGAGTGGTTGTTATTGTGGTGGAGTTTTAAT            |                                                               |     |     |     |     |  |
| Bisulfite-8  | TTTTGTAGTTTGGGGGATTTATTAGTTTTAGAGTGGTTGTTATTGTGGTGGAGTTTTAAT            |                                                               |     |     |     |     |  |
| Bisulfite-9  | TTTTGTAGTTTGGGGGATTTATTAGTTTTAGAGTGGTTGTTATTGTGGTGGAGTTTTAAT            |                                                               |     |     |     |     |  |
| Bisulfite-10 | TTTTGTAGTTTGGGGGATTTATTAGTTTTAGAGTGGTTGTTATTGTGGTGGAGTTTTAAT            |                                                               |     |     |     |     |  |
|              | 190                                                                     | 200                                                           |     |     |     |     |  |
| Genomic      | ..... ..... ..... ..... .....                                           | TCGCCCTATAGTGAGTCGTATTA                                       |     |     |     |     |  |
| Bisulfite-1  | TTGTTTTATAGTGAGTTGTATTA                                                 |                                                               |     |     |     |     |  |
| Bisulfite-2  | TTGTTTTATAGTGAGTTGTATTA                                                 |                                                               |     |     |     |     |  |
| Bisulfite-3  | TTGTTTTATAGTGAGTTGTATTA                                                 |                                                               |     |     |     |     |  |
| Bisulfite-4  | TTGTTTTATAGTGAGTTGTATTA                                                 |                                                               |     |     |     |     |  |
| Bisulfite-5  | TTGTTTTATAGTGAGTTGTATTA                                                 |                                                               |     |     |     |     |  |
| Bisulfite-6  | TTGTTTTATAGTGAGTTGTATTA                                                 |                                                               |     |     |     |     |  |
| Bisulfite-7  | TTGTTTTATAGTGAGTTGTATTA                                                 |                                                               |     |     |     |     |  |
| Bisulfite-8  | TTGTTTTATAGTGAGTTGTATTA                                                 |                                                               |     |     |     |     |  |
| Bisulfite-9  | TTGTTTTATAGTGAGTTGTATTA                                                 |                                                               |     |     |     |     |  |
| Bisulfite-10 | TTGTTTTATAGTGAGTTGTATTA                                                 |                                                               |     |     |     |     |  |

## SI Appendix

**Table S4.**

List of primers used for the amplification and sequencing of *C. albicans* genomic regions. These regions were used as probes in methylation, northern blotting and RAM assays.

| ORF19-x  | Chromo-<br>some | Forward primer (5' - 3') |                               | Reverse primer (5' - 3') |                                 |
|----------|-----------------|--------------------------|-------------------------------|--------------------------|---------------------------------|
|          |                 | Name                     | Sequence                      | Name                     | Sequence                        |
| 1288     | 3               | 1809F                    | ATGTCTCCAATAGATTTTAAAGATAAAG  | 1809R                    | CTTAGCTTTGTCCACCAACTAATTTAATAGC |
| 2253     | 2               | 2253F                    | ATGGTGGTTTCTGATTATAGTGCTACAC  | 2253R                    | GTTGAATTCCGATTCATTATCGTCATCA    |
| 2506     | 3               | 2506F                    | ATGGCGACTACAACATAAAACG        | 2506R                    | TTAATACTCATAATCATTATCGACATTAG   |
| 2769     | 4               | 2769F                    | ATGAATCAAAATAAGAAATTAAGTGG    | 2769R                    | TTATTGTGTACGAACTTCACCATCTTC     |
| 2834     | R               | 2834F                    | ATGTATCAAGAATTACCATTGATGAATTA | 2834R                    | TCACACATTATTATTTAATTTATCTAATT   |
| 3035     | 1               | 3035F                    | TCCGGAAGAAGCTGAGTTAAATCCAG    | 3035R                    | AGCCTATTATACATGGCACCAA          |
| 3924     | 5               | 3924F                    | TTAGTTTTTCTCTGGTAACACAGTGTTG  | 3924R1                   | ATGTACAAGGATGATTTATCTAATTC      |
| 2593     | R               | BIO2F                    | ATGTCTGTTAAAAGATTTTCTCCATG    | BIO2R                    | CTACTTAGTGAACTTTCCATTGGTTTC     |
| 1712     | 3               | GEA2F                    | GAAAAATCCTAAATTGGGAGTTAAACAAT | GEA2R                    | ACCACCGTTGATAAATTGAGCTTTAAAATC  |
| 1712     | 3               | GEA2F                    | ATGGAAATATCTAAACCTTCTACTCCAC  | GEA2R                    | TTAGTTAGCTTGTCTTGGATTGAGC       |
| 1712     | 3               | GEA2-RF                  | TTAAATACTGATCTTCATAATCCTCAAG  | GEA2-RR                  | ATGTTCTTCTGGCATAATGATTTCTC      |
| 5475     | 3               | HV40-2F                  | AGTTCTGTAACCAATTCAAAATGATCT   | HV40-2R                  | TTGATCACTAGATTAAAGCATTGTTG      |
| 5636     | 4               | RBT5F                    | ATGCTCGCCTTATCCTTATTGTCAATC   | RBT5R                    | TTAGAATAAGGCAGCAACAGCGGCAATG    |
| 5636     | 4               | RBT5-RF                  | TCAATTTGCTGGTGCCGTTGGTAACTG   | RBT5-RR                  | ACCGGCGTTAGCAGCTTCAACGGAAAC     |
| 25S rDNA | R               | TbC2F                    | GATCAACTTAGAACTGGTACGGACAAG   | TbC2R                    | GATCGCCCAGAGGGCTTAATCCTAGAA     |
| TUB2     | 1               | TUB1F                    | ATGAGAGAAGTCATCAGTATTAATG     | TUB1R                    | CTAATATTCTTCTTCTTCTCAGGGAAA     |

| Repeat DNA | Subtelomeric | YV2-2F | GGATAAACCCATCTCTATAAGACATCA | YV2-2R | ATTCAACACTATCTCTGATGAAGAACC |
|------------|--------------|--------|-----------------------------|--------|-----------------------------|
| 1725       | 3            | 1725F  | ATTTCAAACCGAAATAATTAACAA    | 1725R  | CTGGGGTGGTAGTGTTACTACTGTT   |
| 2767       | 4            | 2767F  | AAAAGTTGAGGACAACCTCTTTACA   | 2767R  | AACGTAACGTAAAGAATGAGTAAATTC |
| 4549       | 1            | 4549F  | TTCCAATGTTAA GTTTGAATCCCTA  | 4549R  | GGCAAATGATACATAAAATCCAGAC   |

## SI Appendix

**Table S5.**

List of primers used for bisulfite DNA sequencing of *C. albicans*.

| ORF19-x | Chromosome | Forward primer (5'-3') |                               | Reverse primer (5'-3') |                                   |
|---------|------------|------------------------|-------------------------------|------------------------|-----------------------------------|
|         |            | Name                   | Sequence                      | Name                   | Sequence                          |
| 331     | 3          | TbC11BSF               | TGGATTTTATTTTTGTTATTAAGAG     | TbC11BSR               | AAACCTTCCAAATAATAACCATACC         |
| 939     | 5          | TbC4BSF                | TATTAGTGTGATGTTTTTAAGGT       | TbC4BSR                | AATCTCATATTATTTATATTCAATTATACC    |
| 1288    | 3          | FOX2BSF                | ATTTTAAAGATAAAGTTGTTATTATTAT  | FOX2BSR                | CTTCAAATATTCTAATTTACCAAATC        |
| 1622    | 3          | YV15-BSF               | TTTTATTGATATTTTTAATTGTTGTTGTA | YV15-BSR               | ATAATCAAATATTTAATCTTAAAAACCAAATTC |
| 1712    | 3          | 1KbGEA2-BSF            | ATTGATGGGTTTATTAAGATGGTAATG   | 1KbGEA2-BSR            | TTCTTAATTATTTTAAATAAAACCAC        |
|         |            | YV18-BSF               | GATTTTTTTTAGTATGATGGAAAATAT   | YV18-BSR               | AATCTTCATAATCCTCAAATTAATAAAC      |
| 1725    | 3          | 1725-BSF1              | AAGGGTGGTGATTGGATTAGTTGGAGAAG | 1725-BSR               | TATTACTAATCCAAATTTCTCCACCAC       |
| 2216    | 2          | EbC31BSF               | TTTTTTAAAAAGATTAGTAGAAGTTAAAT | EbC31BSR               | AAACTTATTATACCACTATTCAACAATAAT    |
| 2253    | 2          | TbC16BSF               | ATTTGTTTTGTTGGGTATGAATTAA     | TbC16BSR               | TCAATCACATCTATCATTAAACTTTCA       |
| 2407    | R          | HV11-BSF               | GAGAGAAGTTGGTAAAGAAGTTGATGA   | HV11-BSR               | AAAAAACATAACAACCTTTTCTAAAC        |
| 2506    | 3          | TbC34BSF               | AAGAAGTTTTGAAAGTTATTTTTGTAA   | TbC34BSR               | ACTTTTACTACAAATCTTATAATTAATC      |
| 2560    | R          | HV29-3-BSF             | TTATTGGTAAATATAAAGGTGATA      | HV29-3-BSR             | ACCAAATATTAATAATCCCAAAC           |
| 2593    | R          | BIO2-BSF1              | TTATTTAGTGAAATTTTTATTGGTTT    | BIO2-BSR1              | ACCCAAAATCATTACCAATCAACTTT        |
|         |            | BIO2-BSF2              | ATTTGTTGATTGGTAATGATTTGGG     | BIO2-BSR2              | CAATAAAATTATTAACAAATCAAC          |
|         |            | BIO2-BSF3              | TGATTTTGTTAAGGTAGATTTTTTTT    | BIO2-BSR3              | ACAAAATTTACAATACTCCATTAATAA       |
|         |            | BIO2-BSF4              | TGTTAATTTATTTTTGGTTTAGTTAG    | BIO2-BSR4              | TTCAACATCACTACAAACAATACTC         |
|         |            | BIO2-BSF5              | TTGTTTGTAGTGATGTTGAATTAAG     | BIO2-BSR5              | CATATATTAATAATAATAATAA            |

|        |   |            |                                 |            |                                |
|--------|---|------------|---------------------------------|------------|--------------------------------|
| 2605   | R | HV16-BSF   | GAAGAAAGGTGTTGTTGTTTTATTTTT     | HV16-BSR   | TTTATTACCTCTTAATCTTCTCATAACATC |
| 2639.1 | 5 | NbC112BSF  | AGGATTTGATTAATTGATGAATTTGG      | NbC112BSR  | AATCTCACTACCATCCACC            |
| 2769   | 4 | YV50-BSF   | AGATAAAGAGAGGATTAATAAATTTA      | YV50-BSR   | AAACTCACTCTCAAATCCTTTTATTA     |
| 2834   | R | YV10-1-BSF | GATTATAAATTTGTTAAAGATAAATTAG    | YV10-1-BSR | ATTATCAATCAACCAACTTAATCTTCAA   |
| 3035   | 1 | 3035BSF    | TAATTTGAAGTTATTGATTATAAGGTTGA   | 3035BSR    | AATATACTAAACCAAAAACTTTCTTCAC   |
| 3924   | 5 | 3924BSF    | TTGGTAATATAGTGTGAGGAAATTGAT     | 3924BSR    | AAATTATTAAAAAACCAACAAAAAACC    |
| 4015   | 5 | TbC27BSF   | TTGGGGTTATTATGTTGAAATTGT        | TbC27BSR   | CAAACCTTAAATTTACCCCATTCTT      |
|        |   | TbC27BSF1  | AAATTGAATATTAATTGTAAAGTAAAAA    | TbC27BSR1  | AAAACAAAATCAAAAAAATCC          |
|        |   | TbC27BSF2  | TGGGTTATAGATAGTTATTAAGAGAAGTAT  | TbC27BSR2  | AATTATACAACAAAACCTTAAAAAAA     |
| 4131   | 5 | NbC24BSF   | AATTTTTATTGATGTTTTGGGAT         | NbC24BSR   | CAACTTTAACTTCATATTCTAATCTCTAC  |
| 4227   | 5 | EbC36BSF   | TAAGTTTTAATTGAAATAGTTGAAATTTTA  | EbC36BSR   | ATTTACTACATTAATTATTAATCCATATT  |
| 4379   | R | HV24-2-BSF | TTTTAATTTTTTTTTTAATTAT          | HV24-2-BSR | AATACTATTTAACAACATTTCT         |
| 4549   | 1 | 4549-BSF   | TTGAATTTTGGATGGATTTAATGTTA      | 4549-BSR   | AAAACATACAAAAACCCATAATTAAC     |
| 5087   | 1 | HV43-BSF   | AGTTTTGTAATTTAAGTTGTTGATGATT    | HV43-BSR   | AATCAAATCATCCTACAAATTCAAAAA    |
| 5469   | 3 | HV8-1-BSF  | GTGGTGGTTGATAGTAAGTTTGATG       | HV8-1-BSR  | AAACAAATACCCACAAATCTCCTT       |
| 5475   | 3 | YV6-BSF    | AATTTATTTATATTGATAAAATTGTG      | YV6-BSR    | TATTCAAATATTCAAAAACCAACCC      |
| 5526   | 6 | SEC20-BSF  | ATGTTAATAGTATATTATAAAAAATTAG    | SEC20-BSR  | TATTCAATTCCTCTACAATATACCTACTA  |
|        |   | SEC20-BSF1 | GAATATTGATAATATTGATTAGTAAATTAAG | SEC20-BSR1 | CTATAATTCATCTACAATATATTCCAT    |
| 5636   | 4 | RBT5-BSF1  | TTTTGTTTAGGTGTTATATGGGTATT      | RBT5-BSR1  | TTTTAACAACACTTAAAAAATAATA      |
|        |   | RBT5-BSF2  | TATATATTATTTTTTAAGTGTGTTA       | RBT5-BSR2  | ACATCAACAACCTTAACCAAAA         |
|        |   | RBT5-BSF3  | TTTTGGTTAAGGTTGTTGATGT          | RBT5-BSR3  | TAAAAATAAAACAACAACAA           |
| 5749   | 6 | EbC26BSF   | AATTTTAATTGTATTATGGGTTTAA       | EbC26BSR   | CCAATATTCCTTCTTATTAATCTTTTT    |

|             |       |            |                                 |            |                                |
|-------------|-------|------------|---------------------------------|------------|--------------------------------|
|             |       | EbC26BSF1  | TAAAAAAGATTAATAAGAAGAATATTGG    | EbC26BSR1  | ATTA AAAA ACCAATACACTAAAATC    |
|             |       | EbC26BSF2  | TGATTTAAATGATTTTGGTGGATTT       | EbC26BSR2  | TTAAAATTATCTTTTTCAATAACAATAAC  |
|             |       | EbC26BSF3  | TATTGATAGTTTGTGTGTGAAATTTGTTA   | EbC26BSR3  | ATTAAATCAAATATTTAAATAATTAATAA  |
| 5779        | 2     | HV12-BSF   | TATAATGATAATAATTTATTTAGATTA     | HV12-BSR   | ATAACCCCTTAATATATCATTAC        |
| 6286.2      | R     | YV19-BSF   | GTATTATTAATAATGAATTAGGAT        | YV19-BSR   | AATCACAAATAACAACAATTTAAAC      |
| 6440        | R     | NbC130BSF  | GATGTGGATGAAGTTGTTTT            | NbC130BSR  | AATCTAATCAATCTTCC              |
| 6784        | 3     | TbC25BSF   | GATAAAGAATTTTTGAAGTGGTTGA       | TbC25BSR   | ACCCCAATTACAAATACAAATACCA      |
|             |       | TbC25BSF1  | AAATGGAAAATTGAAATGTAATTAA       | TbC25BSR1  | CAAAAAATTATTCAAATTATTCTAATACTA |
|             |       | TbC25BSF2  | GTTAGTTTTGGATTAAGTATTAAGGATAAT  | TbC25BSR2  | TAAACACAAATAAAAACTTCTTAAAAATAA |
| 6926        | 3     | YV32-BSF   | GTTGGATATATGATTTTGAGAAAG        | YV32-BSR   | TCAAATAAATACACACCAAAAAAT       |
| 7216        | 1     | EbC24BSF   | AAATAGGAAGAGTTTTATTTGTGGA       | EbC24BSR   | AAAAAAAATATTTATTCATACACTC      |
| 7270        | 1     | EbC28BSF   | GGGTGGTTATTA AATTGTTTGG         | EbC28BSR   | TCATCAAATTAACAAAAATTACTTCATAC  |
| 10276       | 4     | TbC36BSF   | TTTTAATTGGATTATTAATGGTAT        | TbC36BSR   | ATAAATTAATTCTAAAATCAATTCC      |
| 25S rDNA    | R     | TbC2BSF    | GTTGGTGGATGTTGTTGTAGATA         | TbC2BSR    | CCTTAAAAAATCATAATTACTCCC       |
|             |       | TbC2BSF1   | GAGTAATTATGATTTTTTAAAGGTAGTTAA  | TbC2BSR1   | TAAAATTTAACCTCCA ACTCC         |
|             |       | HV48-1-BSF | AGTTTTTATTAGAGTTTTTTTTGGTTTTAT  | HV48-1-BSR | TTACCTAAAATATTAACATAATAATCT    |
| NCR         | 6     | HV28-BSF   | TGTTTGTGTGTAGGAAAAAAGGTTGA      | HV28-BSR   | CAACTAAATAATTTACTATAATTTT      |
| NCR         | 2     | YV41-BSF   | AAAAGAGAAATGATTAGTTAAGGTTATATA  | YV41-BSR   | AAAAAAATTCACAAACACC            |
| Large rDNA  | mtDNA | TbC49BSF   | GTTAGGGATAAATTGTTAGTTTTTTTATAT  | TbC49BSR   | TATCACTATTTAATTCAAACTATATCATCA |
|             |       | TbC49BSF1  | ATGGGGTGAATTGTAAGAAAGTTTA       | TbC49BSR1  | TCATTAACCTCTTTATACTAATATCTATAA |
|             |       | TbC49BSF2  | TATTATAATGATTTTTAATTAATTGTAATT  | TbC49BSR2  | AAATATCACCCACCTCCTTTAAAA       |
| DNA repeats | mtDNA | YV31-BSF   | GTAGATTTTATTTAGTATTAATTATTTAATA | YV31-BSR   | CACCTAAAATATTATATTTCAAATAAAATT |



|         |         |                |                               |                |                            |
|---------|---------|----------------|-------------------------------|----------------|----------------------------|
|         |         |                | GG                            |                |                            |
| Vector  | Control | M13F-Bisulfite | ATAAAACAACAACCAATAAATT        | M13R-Bisulfite | TAGGAAATAGTTATGATTATG      |
| CaCEN1* | Control | METHCEN1F<br>4 | TTGTTTTGAAGTAGTAGTAATTGATAGTA | METHCEN1R4     | AATAAAACCAAAAATATCCTTCATTC |

\*These primers were derived from a previous study (1).

1. Baum M, Sanyal K, Mishra PK, Thaler N, & Carbon J (2006) Formation of functional centromeric chromatin is specified epigenetically in *Candida albicans*. *Proc Natl Acad Sci U S A* 103:14877-14882.
